# Supplementary material
Source: PubMed Central journal article supplement (PMC4724550)

Figure S1

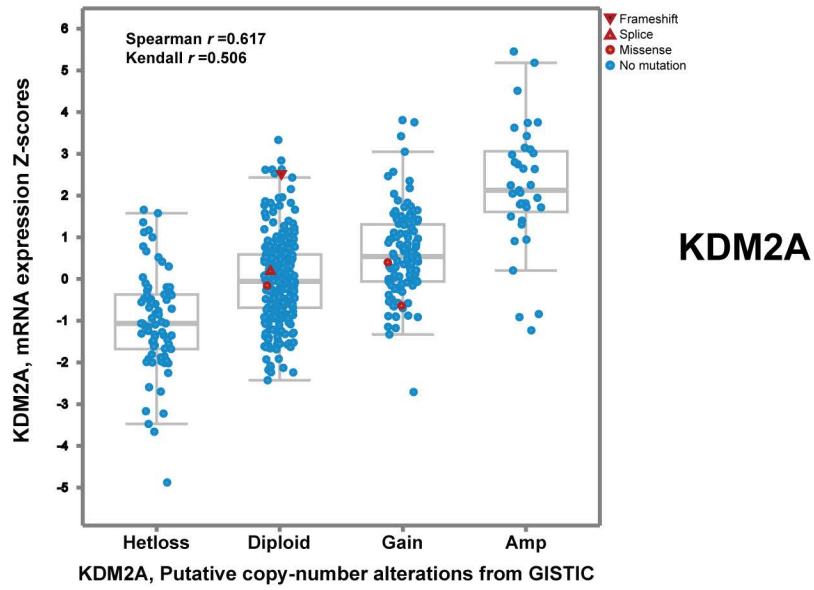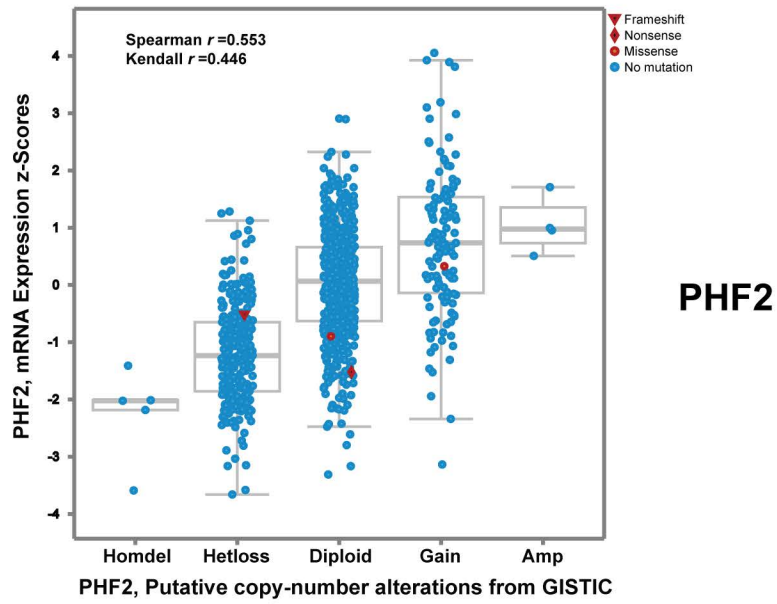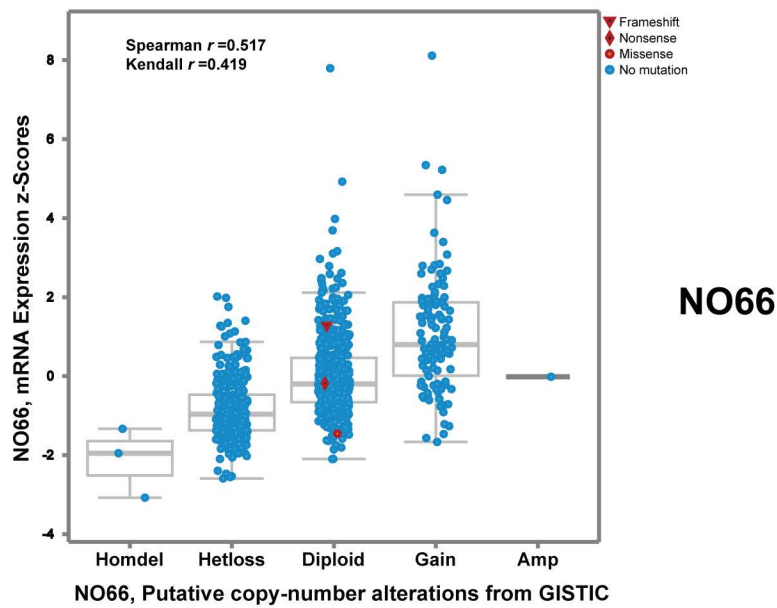

Figure S2

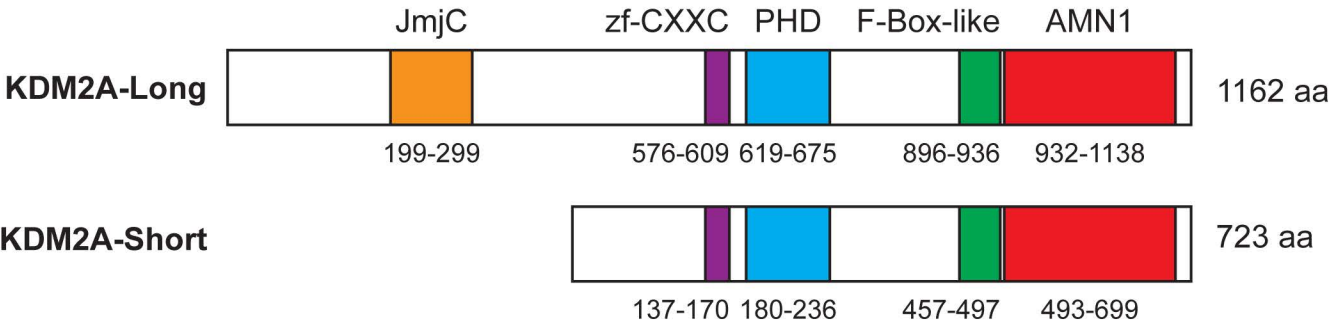

Figure S3

Breast cancer  
Cell lines

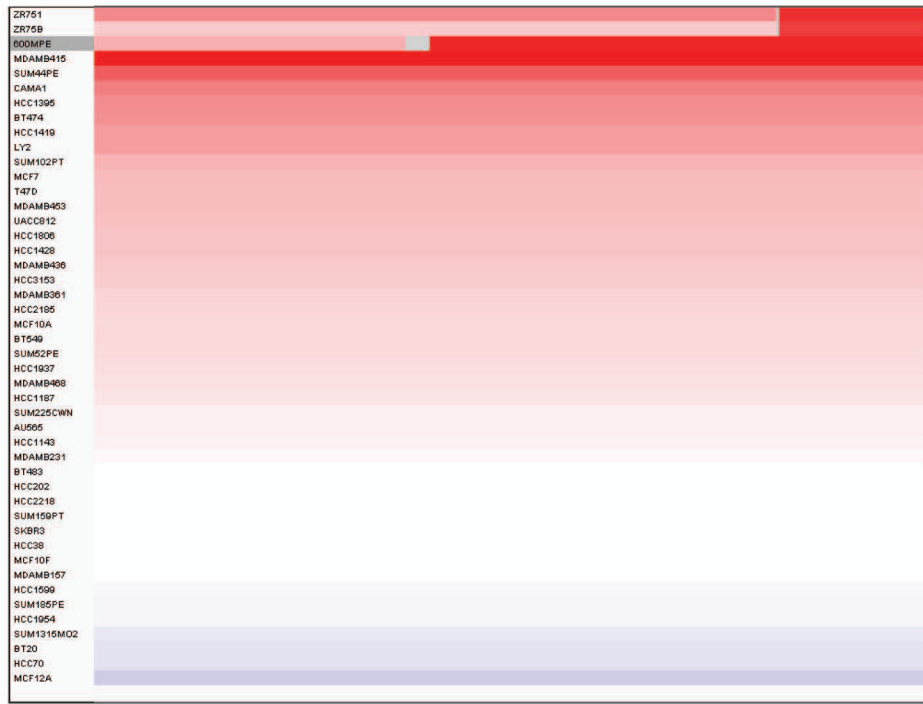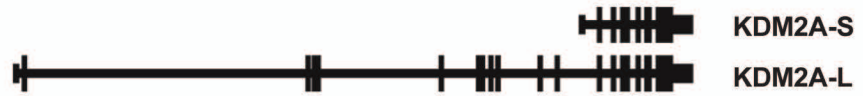

Figure S4

**A**

| Sample ID    | Subtype | Expression Z-Score |
|--------------|---------|--------------------|
| TCGA-BH-A0DI | LumA    | 5.54               |
| TCGA-E2-A1IU | LumA    | 4.16               |
| TCGA-C8-A12Q | Her2    | 12.29              |
| TCGA-AQ-A04L | LumA    | 3.18               |
| TCGA-AC-A2FM | N/A     | 3.08               |
| TCGA-E2-A15O | LumA    | 2.72               |
| TCGA-AR-A0U3 | LumA    | 5.44               |
| TCGA-OL-A66J | N/A     | 2.16               |
| TCGA-BH-A0BV | LumA    | 1.18               |
| TCGA-BH-A0BD | LumB    | 4.85               |
| TCGA-BH-A0W3 | LumB    | 7.41               |
| TCGA-E2-A2P6 | N/A     | 5.26               |
| TCGA-BH-A18T | Basal   | 5.65               |
| TCGA-BH-A18L | LumB    | 5.47               |
| TCGA-BH-A201 | LumA    | 23.92              |
| TCGA-S3-A6ZG | N/A     | N/A                |

**B**

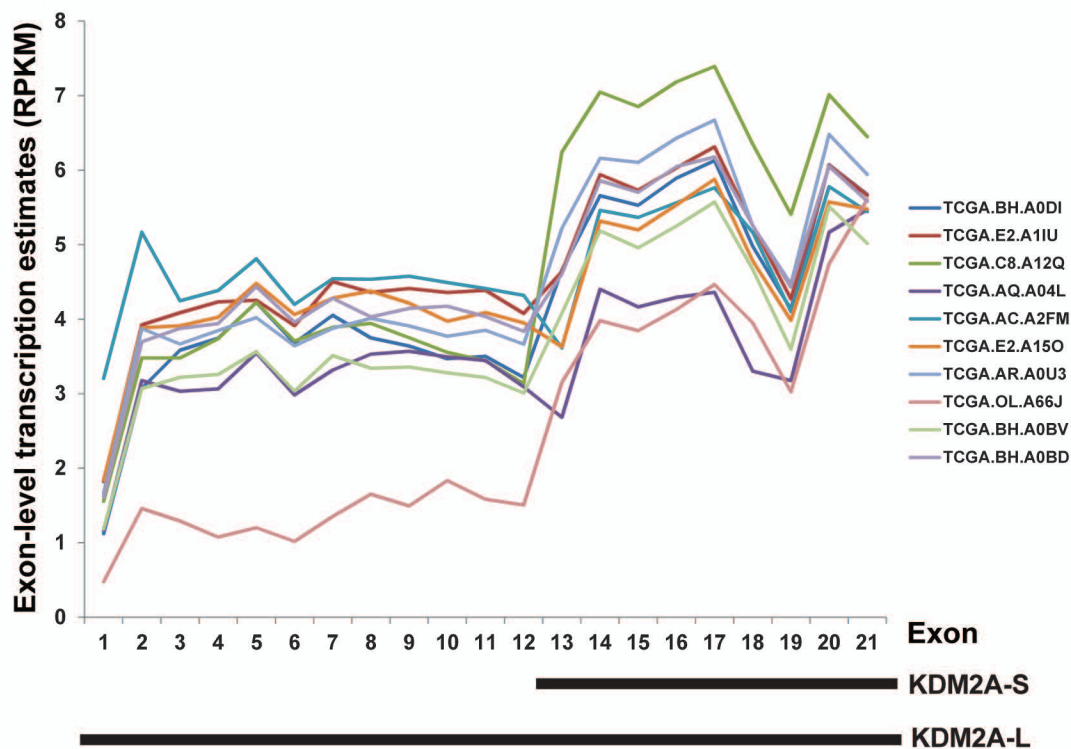

Figure S5

**A**

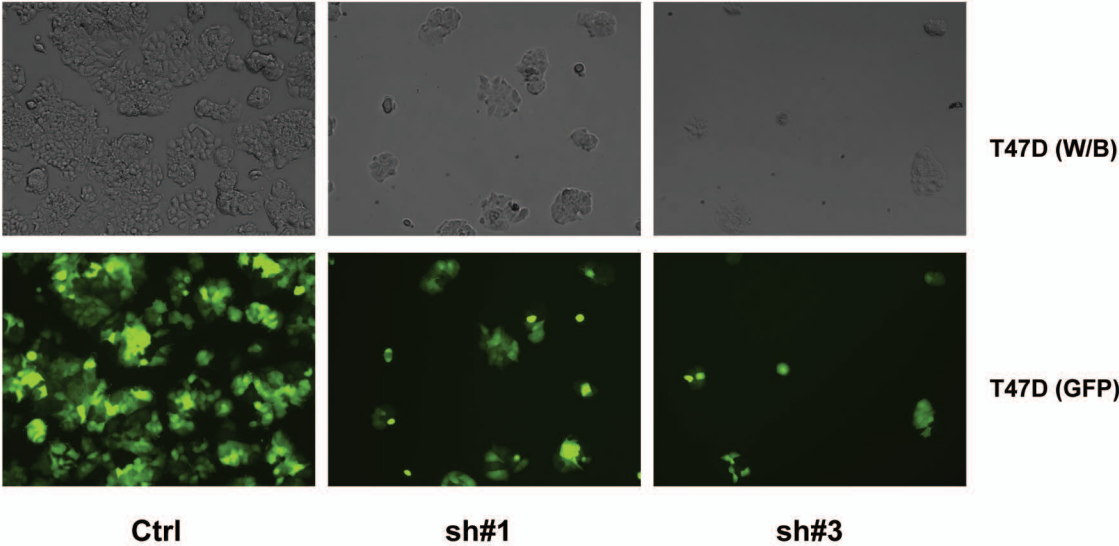

**B**

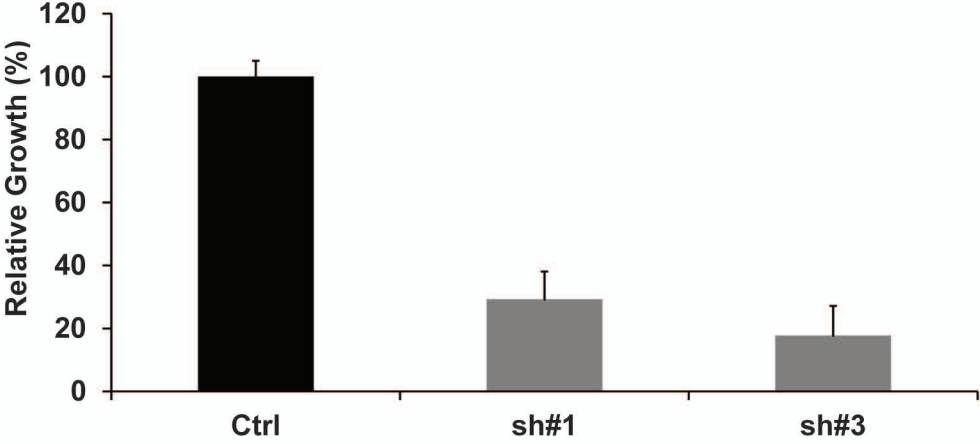

Figure S6

**A**

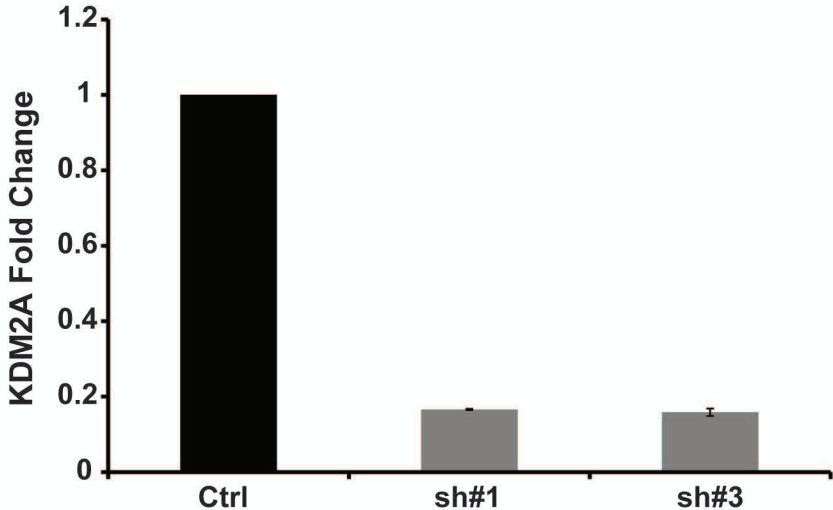

**B**

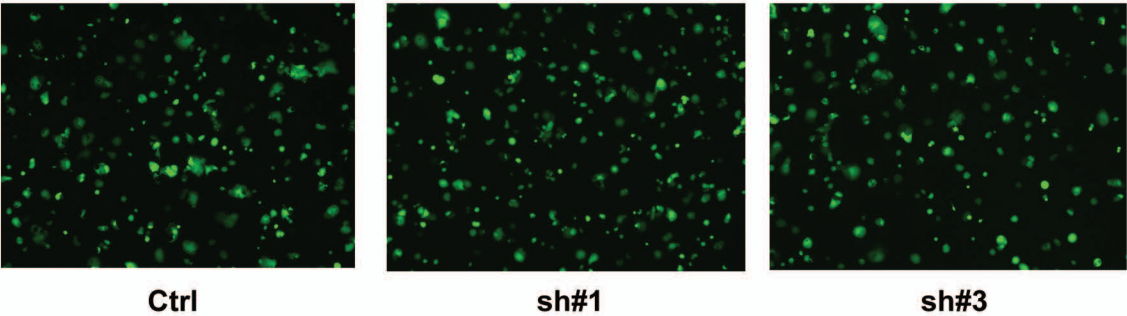

Figure S7

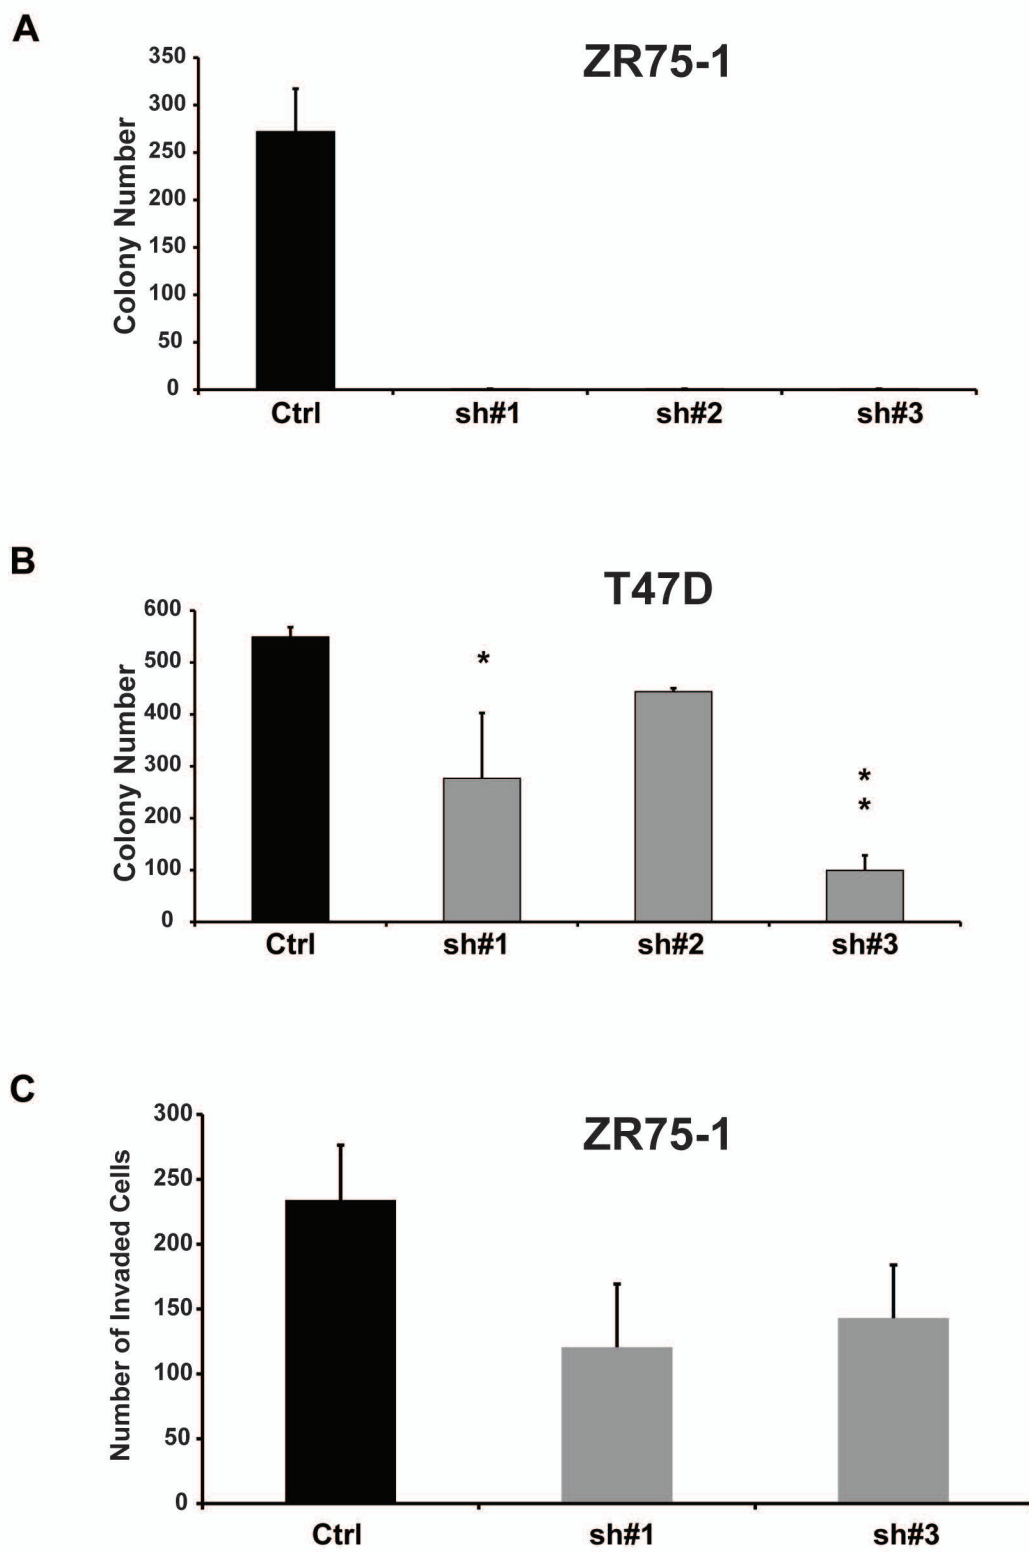

Figure S8

**A**

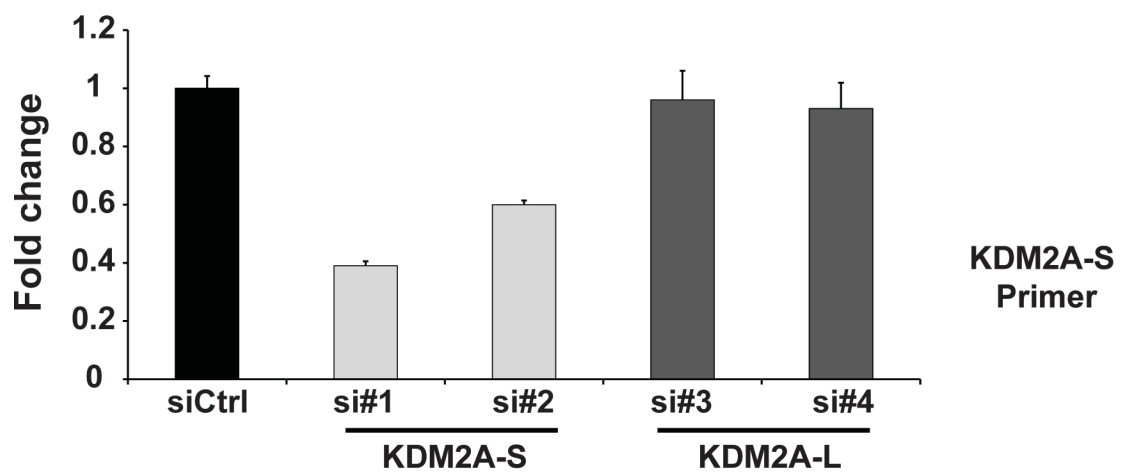

**B**

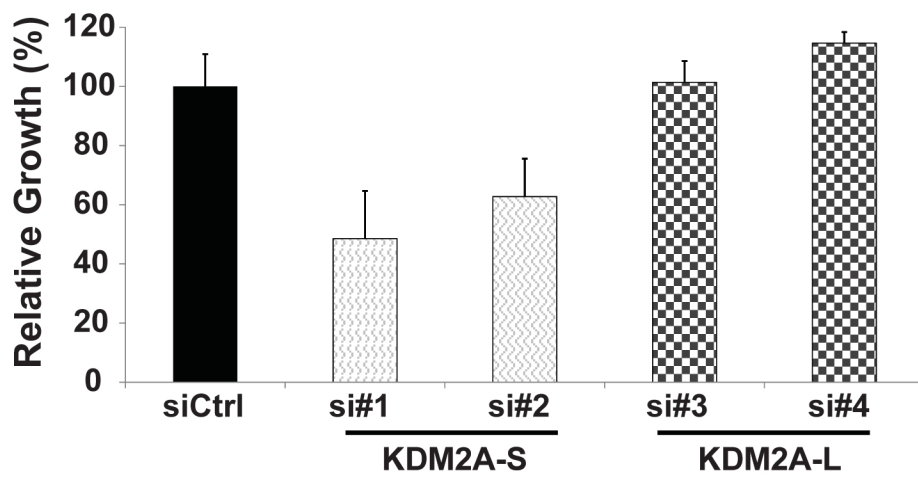



Figure S9

**A**

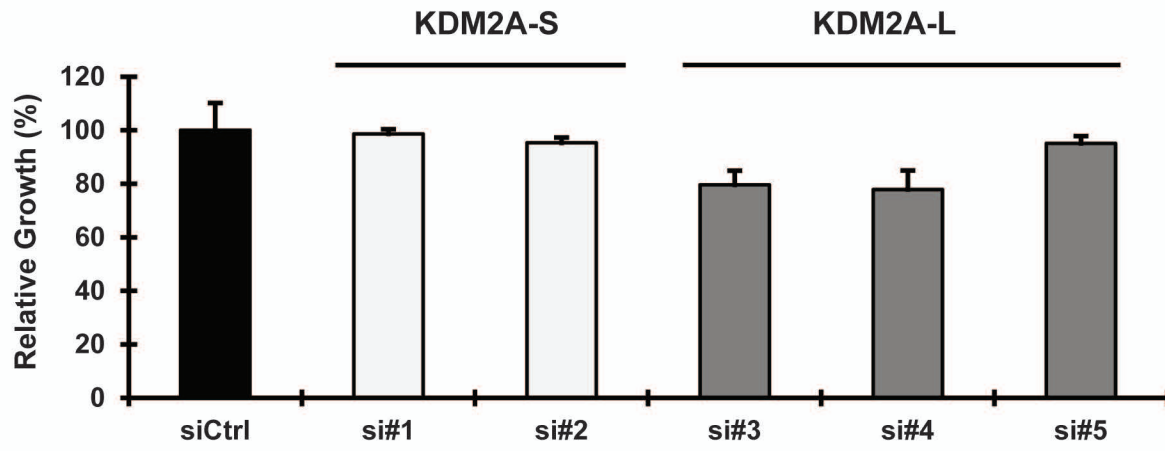

**B**

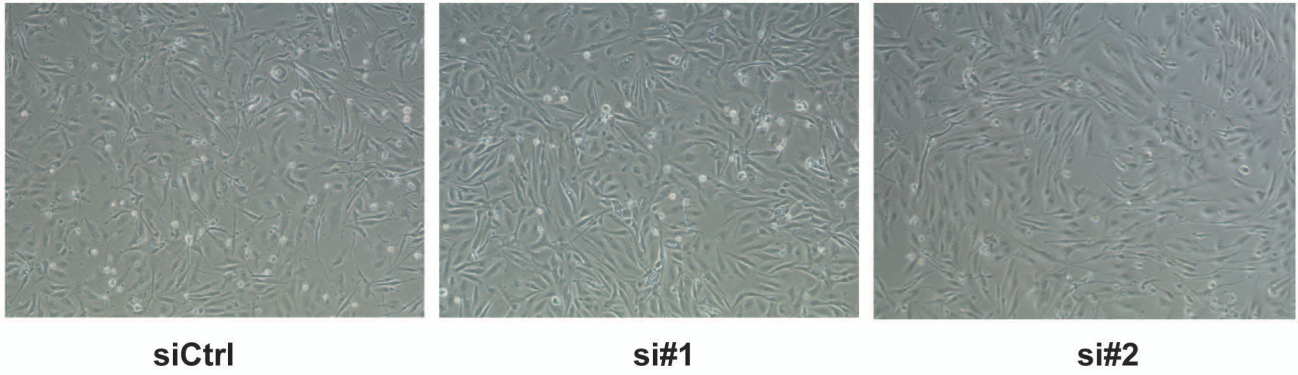

Figure S10

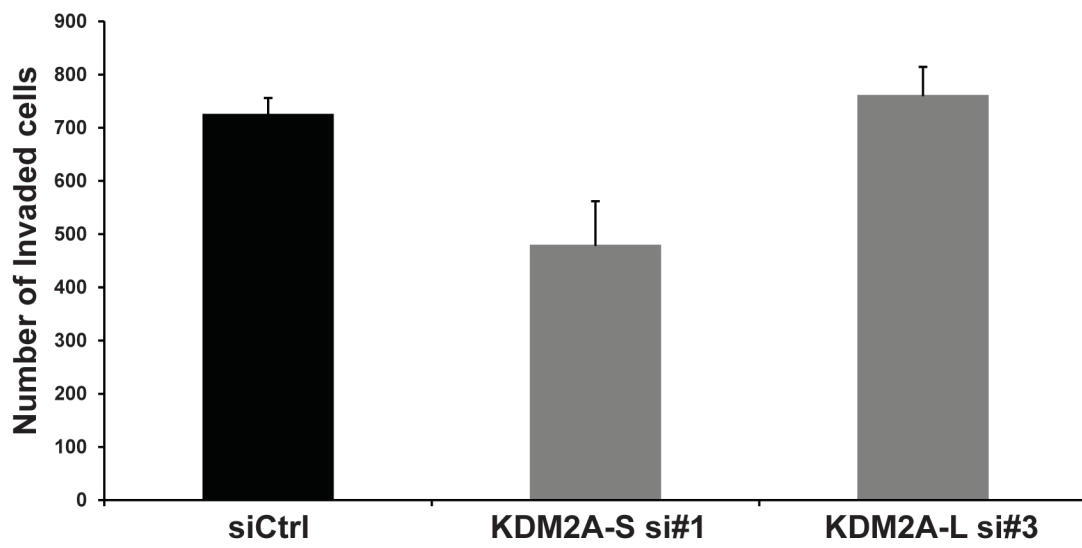

Figure S11

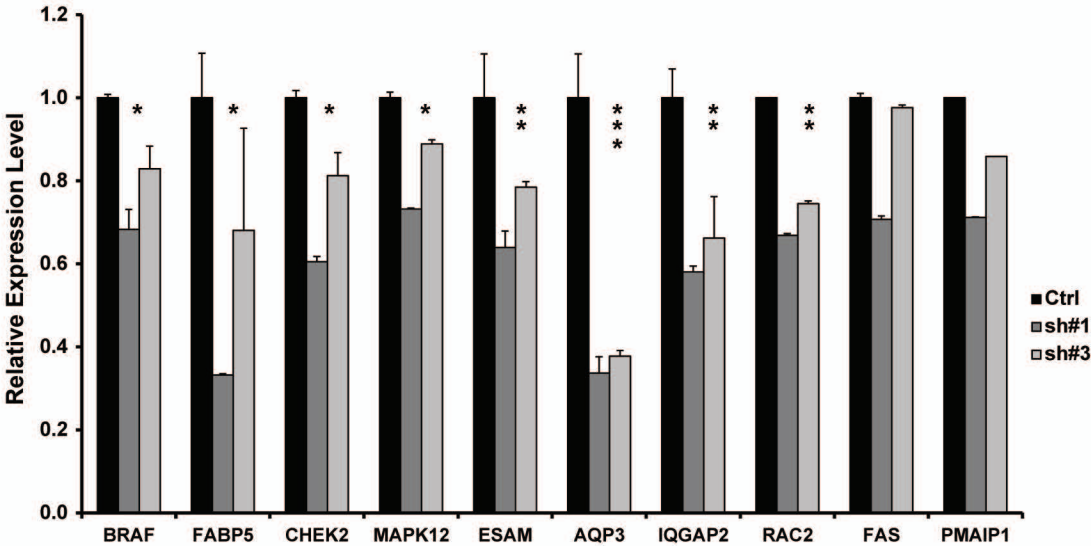

Figure S12

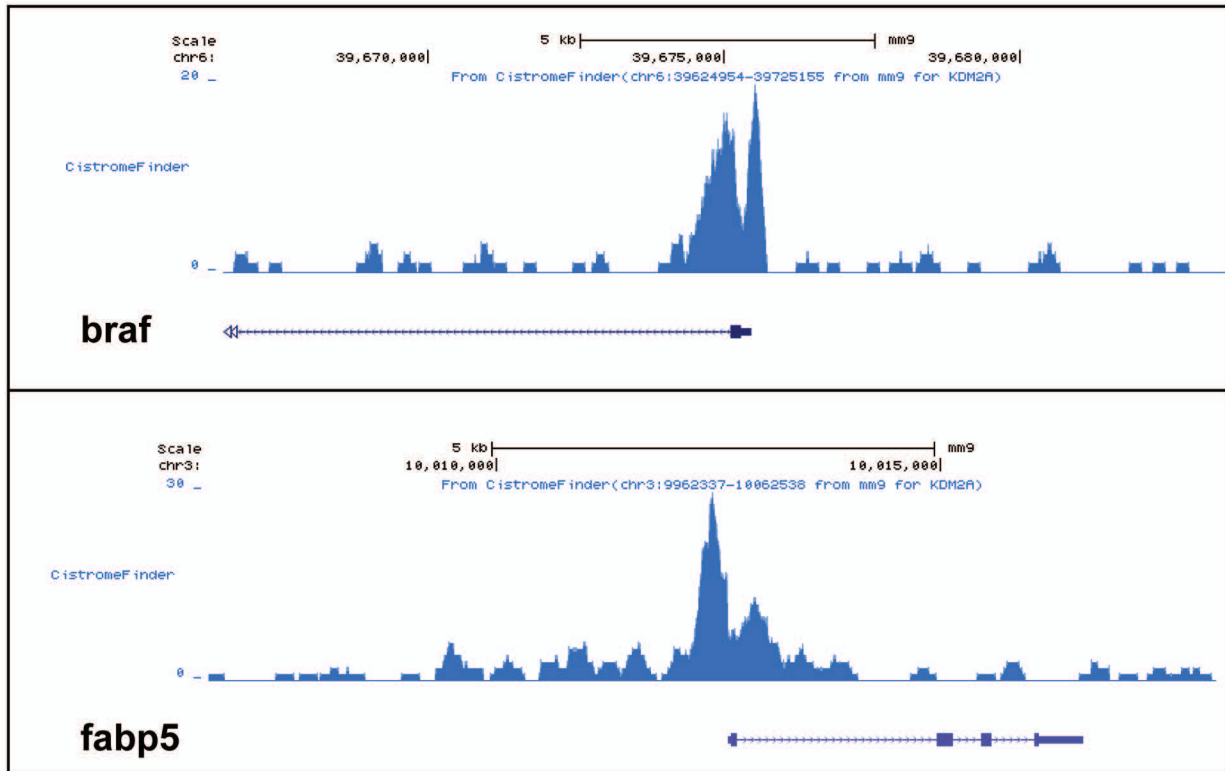

Supplement: NIHMS689466-supplement-Supp_FigureS1-S12.pdf [file NIHMS689466-supplement-Supp_FigureS1-S12.pdf]
