# Supplementary material
Source: PubMed Central journal article supplement (PMC4724550)
Supplement: NIHMS689466-supplement-Supp_TableS1-S11.pdf [file NIHMS689466-supplement-Supp_TableS1-S11.pdf]

**Table S1. Primer Sequences**

| <b>Primer</b>   | <b>Sequence</b>         |
|-----------------|-------------------------|
| KDM5B-Forward   | CTGCAGTGGAGAAGACATTCTG  |
| KDM5B-Reverse   | GGAAAACAAAAATTGGCAACAG  |
| KDM2A-Forward   | CAACAGCGATCCCAAGTTAGC   |
| KDM2A-Reverse   | TGGCCGAGTGGGGAATTTAAG   |
| JMJD1C-Forward  | CAGGTCTCGTGCCAATCAAAA   |
| JMJD1C-Reverse  | GCTGTTGCTGGTGTGTATTCT   |
| JHDM1D-Forward  | GTATCACTGTCCCAACTGTGC   |
| JHDM1D-Reverse  | TTCTGTGTAGTCATGTCTGTGC  |
| KDM5C-Forward   | CATCACTGCAGAAAGAACTCC   |
| KDM5C-Reverse   | AATGTCCAGAATAGGCAAATGG  |
| PHF2-Forward    | CTCCCCACGACGTTACCC      |
| PHF2-Reverse    | CAGTGGTATATGTCGATGTCGG  |
| KDM6B-Forward   | CACCCCAGCAAACCATATTATGC |
| KDM6B-Reverse   | CACACAGCCATGCAGGGATT    |
| KDM5A -Forward  | TCTAGCTGGGGGAGAAGACA    |
| KDM5A-Reverse   | ATGGCTTTGCTGCAGTACCT    |
| KDM4C-Forward   | CAAAGCCTAAATGCTAGTTGTGG |
| KDM4C-Reverse   | CCATGTTTGTTCATCTTTAATGG |
| KDM1B-Forward   | ATCCAGCTTACTCCACAGATAGC |
| KDM1B-Reverse   | AGGTCTCAGGCTTAATAGCAGT  |
| JARID2-Forward  | ACCAGTCTAAGGGATTAGGACC  |
| JARID2-Reverse  | TGCTGGGACTATTTCGGCTGA   |
| KDM4A-Forward   | ATCCCAGTGCTAGGATAATGACC |
| KDM4A-Reverse   | ACTCTTTTGGAGGAACAACCTTG |
| KDM4D-Forward   | GGGCAGGGGTGTTTACTCAAT   |
| KDM4D-Reverse   | TGTTTGCCAAATGGCGTACT    |
| MINA-Forward    | CCACATACTATGGGTCCCTGT   |
| MINA-Reverse    | TGAAACTGAATCGTTGCCCTT   |
| KDM4E-Forward   | TCCCCAGAACACGAGTCATAC   |
| KDM4E-Reverse   | TTGGGTGGAATTACCTTGCA    |
| KDM2B-Forward   | GGGTTCCCCTGATATTTGAGA   |
| KDM2B-Reverse   | GCTCCCCACTAGGAGTTTGAC   |
| KDM3A-Forward   | ACAGTGGCCTGCAATAACGTA   |
| KDM3A-Reverse   | TCCCAGAAAGCGAACAGAAAGT  |
| KDM1A- Forward  | CAAGAAGCAGCCTGTTTTCC    |
| KDM1A- Reverse  | CTGCAGTGTGCGGTTTCTAA    |
| KDM8-Forward    | AAGTTGTTGAGGTACACAGA    |
| KDM8-Reverse    | GGCTCATTACGATGTATTTGC   |
| KDM4B-Forward   | ACTTCAACAAATACGTGGCCTAC |
| KDM4B-Reverse   | CGATGTCATCATACGTCTGCC   |
| PHF8-Forward    | GTGCCGGTGTATTGCCTCT     |
| PHF8-Reverse    | CAACACAAGTCCATGAAACC    |
| KDM6A-Forward   | TACAGGCTCAGTTGTGTAACCT  |
| KDM6A-Reverse   | CTGCGGGAATTGGTAGGCTC    |
| KDM3B-Forward   | GCTTCGGTTCCTGTCAGATG    |
| KDM3B-Reverse   | GACCTCGGCTGAATATCTCTTG  |
| NO66-Forward    | GCGAGCCAAAGACTTCATTG    |
| NO66-Reverse    | GAATTGGAAGCCCGTAAACA    |
| KDM2A-L-Forward | CCGGATCCAGACTTCACTGT    |
| KDM2A-L-Reverse | CTCCTCCTCTGGGGTCTCAT    |
| KDM2A-S-Forward | TGAAGGGTCAGAGCTGGACT    |
| KDM2A-S-Reverse | GAAGTTTCCCCAGCGTCTTT    |
| BRAF-Forward    | TGGGGAACGGAAGTATTTTTT   |
| BRAF-Reverse    | TTTTGTGGTACTTGGGGTTG    |
| FABP5-Forward   | TGAAGGAGCTAGGAGTGGGAA   |
| FABP5-Reverse   | TGCACCATCTGTAAAGTTGCAG  |
| CHEK2-Forward   | TTATCTGCCTTAGTGGGTATCCA |
| CHEK2-Reverse   | CTGTCGTAAAACGTGCCTTTG   |
| MAPK12-Forward  | CATGAGAAGCTAGGCGAGGAC   |
| MAPK12-Reverse  | CAGCGTGGATATACCTCAGCC   |
| ESAM-Forward    | GGGGTCACAACAAGCAAACC    |
| ESAM-Reverse    | TTGTCTTGACATTACGGAG     |
| AQP3-Forward    | CCGTGACCTTTGCCATGTG     |
| AQP3-Reverse    | CGAAGTGCCAGATTGCATCATAA |
| IQGAP2-Forward  | TGGTTAAGAGCGATGGAGTCT   |
| IQGAP2-Reverse  | CAGATACAAACTCAGTGCGTGA  |
| RAC2-Forward    | TCTGCTTCTCCCTCGTCAG     |
| RAC2-Reverse    | TCACCGAGTCAATCTCCTTGG   |
| FAS-Forward     | TCTGGTTCTTACGTCTGTTGC   |
| FAS-Reverse     | CTGTGCAGTCCCTAGCTTTCC   |
| PMAIP1-Forward  | ACCAAGCCGGATTTCGATT     |
| PMAIP1-Reverse  | ACTTGCACTTGTTCCTCGTGG   |
| PUM1-Forward    | GACGCTATGGTGGACTACTTCT  |
| PUM1-Reverse    | TGGAACGCACCTGATGTTCTG   |

**Table S2. KDM2A shRNA and siRNA sequences**

| <b>GIPZ Lentiviral Human KDM2A shRNA</b> |              |                     |
|------------------------------------------|--------------|---------------------|
| shRNA                                    | Clone ID     | Sequence (5'-3')    |
| KDM2A-shRNA#1                            | V2LHS_51035  | ACATTCACAAAGTTCTCTG |
| KDM2A-shRNA#2                            | V2LHS_51037  | TCATAATCCAGGTTGACTC |
| KDM2A-shRNA#3                            | V2LHS_245727 | ATAGGAACTCCAGTGAGGG |

  

| <b>KDM2A-S and KDM2A-L MISSION siRNA</b> |                  |                     |
|------------------------------------------|------------------|---------------------|
| siRNA                                    | Oligo Name       | Sequence (5'-3')    |
| KDM2A-siRNA#1                            | KDM2A-S-siRNA-S1 | GGCAGAAUAUCUAACUCCU |
|                                          | KDM2A-S-siRNA-A1 | AGGAGUUAGAUUUCUGCC  |
| KDM2A-siRNA#2                            | KDM2A-S-siRNA-S2 | CAGCUCCAGAGCGACGGGA |
|                                          | KDM2A-S-siRNA-A2 | UCCCGUCGCUCUGGAGCUG |
| KDM2A-siRNA#3                            | KDM2A-L-siRNA-S1 | CUGGAUUCAUGCUGUGUAU |
|                                          | KDM2A-L-siRNA-A1 | AUACACAGCAUGAAUCCAG |
| KDM2A-siRNA#4                            | KDM2A-L-siRNA-S2 | CUUGAGAGAUCCUCUGAUU |
|                                          | KDM2A-L-siRNA-A2 | AAUCAGAGGAUCUCUCAAG |
| KDM2A-siRNA#5                            | KDM2A-L-siRNA-S3 | CAACAAAUUAAUGCCA AU |
|                                          | KDM2A-L-siRNA-A3 | AUUGGCAUUUAUUUGUUG  |

**Table S3. Frequency (%) of genetic alterations of KDMs in Luminal A, Luminal B, HER2+ and basal-like subtypes of breast cancer**

| Gene   | Luminal A |        |          | Luminal B |        |          | HER2  |        |          | Basal |        |          |
|--------|-----------|--------|----------|-----------|--------|----------|-------|--------|----------|-------|--------|----------|
|        | Amp       | Homdel | Mutation | Amp       | Homdel | Mutation | Amp   | Homdel | Mutation | Amp   | Homdel | Mutation |
| KDM1A  | 0.00      | 0.00   | 0.44     | 0.00      | 0.00   | 0.00     | 0.00  | 1.82   | 0.00     | 0.00  | 0.00   | 0.00     |
| KDM1B  | 0.91      | 0.00   | 0.00     | 0.83      | 0.83   | 0.83     | 0.00  | 0.00   | 0.00     | 10.11 | 0.00   | 0.00     |
| KDM2A  | 2.73      | 0.00   | 1.33     | 12.40     | 0.00   | 0.83     | 9.09  | 0.00   | 1.79     | 2.25  | 0.00   | 0.00     |
| KDM2B  | 0.00      | 0.45   | 0.44     | 0.00      | 0.00   | 0.83     | 0.00  | 0.00   | 1.79     | 1.12  | 0.00   | 0.00     |
| KDM3A  | 0.00      | 0.00   | 0.89     | 0.00      | 0.00   | 0.00     | 0.00  | 0.00   | 0.00     | 1.12  | 1.12   | 1.05     |
| KDM3B  | 0.45      | 0.00   | 0.44     | 0.00      | 0.00   | 0.83     | 0.00  | 0.00   | 1.79     | 0.00  | 1.12   | 1.05     |
| JMJD1C | 0.45      | 0.00   | 0.44     | 1.65      | 0.83   | 0.83     | 1.82  | 0.00   | 0.00     | 5.62  | 0.00   | 0.00     |
| KDM4A  | 0.45      | 0.00   | 1.33     | 0.83      | 0.00   | 1.65     | 3.64  | 0.00   | 0.00     | 3.37  | 0.00   | 0.00     |
| KDM4B  | 0.91      | 0.00   | 0.89     | 3.31      | 0.00   | 0.00     | 0.00  | 0.00   | 0.00     | 2.25  | 0.00   | 0.00     |
| KDM4C  | 0.45      | 0.45   | 0.89     | 0.00      | 0.83   | 0.00     | 1.82  | 1.82   | 0.00     | 12.36 | 1.12   | 1.05     |
| KDM4D  | 0.45      | 0.91   | 0.44     | 1.65      | 2.48   | 0.00     | 1.82  | 0.00   | 0.00     | 5.62  | 0.00   | 0.00     |
| KDM4E  | 0.45      | 0.91   | 0.00     | 1.65      | 2.48   | 0.00     | 1.82  | 0.00   | 0.00     | 4.49  | 0.00   | 0.00     |
| KDM5A  | 0.91      | 0.00   | 0.44     | 4.13      | 0.00   | 0.83     | 3.64  | 0.00   | 1.79     | 17.98 | 1.12   | 2.11     |
| KDM5B  | 13.18     | 0.00   | 0.44     | 15.70     | 0.00   | 0.00     | 16.36 | 0.00   | 0.00     | 8.99  | 0.00   | 1.05     |
| KDM5C  | 0.91      | 0.00   | 0.00     | 0.00      | 0.00   | 0.83     | 3.64  | 0.00   | 5.36     | 0.00  | 2.25   | 1.05     |
| KDM6A  | 0.91      | 0.45   | 1.78     | 0.83      | 0.00   | 1.65     | 0.00  | 0.00   | 0.00     | 0.00  | 2.25   | 2.11     |
| KDM6B  | 0.00      | 0.45   | 0.00     | 0.00      | 2.48   | 0.00     | 0.00  | 1.82   | 1.79     | 0.00  | 1.12   | 0.00     |
| KDM7A  | 0.45      | 0.00   | 0.00     | 0.83      | 0.00   | 0.00     | 1.82  | 0.00   | 0.00     | 5.62  | 1.12   | 2.11     |
| PHF8   | 0.91      | 0.00   | 1.33     | 0.00      | 0.00   | 0.00     | 1.82  | 0.00   | 0.00     | 1.12  | 2.25   | 1.05     |
| PHF2   | 0.00      | 0.45   | 0.44     | 0.83      | 0.00   | 0.00     | 1.82  | 1.82   | 0.00     | 1.12  | 0.00   | 1.05     |
| MINA   | 0.45      | 0.00   | 0.00     | 2.48      | 0.83   | 0.00     | 1.82  | 0.00   | 0.00     | 2.25  | 0.00   | 0.00     |
| NO66   | 0.45      | 0.00   | 0.44     | 0.00      | 0.83   | 0.00     | 0.00  | 1.82   | 0.00     | 0.00  | 1.12   | 1.05     |
| KDM8   | 7.27      | 0.00   | 0.00     | 1.65      | 0.00   | 0.00     | 3.64  | 0.00   | 0.00     | 0.00  | 0.00   | 0.00     |
| JARID2 | 1.36      | 0.00   | 0.44     | 0.00      | 0.83   | 0.00     | 0.00  | 1.82   | 0.00     | 10.11 | 0.00   | 2.11     |

Footnote: Amp=high-level amplification; Homdel=homozygous deletion.

**Table S4. Correlation between copy number and mRNA expression of KDMs in breast cancer**

| <b>Gene</b>   | <b>Spearman</b> | <b>p-value</b> | <b>Kendall</b> | <b>p-value</b> | <b>Pearson</b> | <b>p-value</b> |
|---------------|-----------------|----------------|----------------|----------------|----------------|----------------|
| <b>KDM2A</b>  | 0.617           | 2.20E-16       | 0.506          | 2.20E-16       | 0.556          | 2.20E-16       |
| <b>KDM4C</b>  | 0.606           | 2.20E-16       | 0.496          | 2.20E-16       | 0.611          | 2.20E-16       |
| <b>PHF2</b>   | 0.553           | 2.20E-16       | 0.446          | 2.20E-16       | 0.547          | 2.20E-16       |
| <b>KDM3B</b>  | 0.525           | 2.20E-16       | 0.423          | 2.20E-16       | 0.520          | 2.20E-16       |
| <b>NO66</b>   | 0.517           | 2.20E-16       | 0.419          | 2.20E-16       | 0.495          | 2.20E-16       |
| <b>KDM4A</b>  | 0.491           | 2.20E-16       | 0.394          | 2.20E-16       | 0.527          | 2.20E-16       |
| <b>KDM5B</b>  | 0.482           | 2.20E-16       | 0.386          | 2.20E-16       | 0.454          | 2.20E-16       |
| <b>JARID2</b> | 0.456           | 2.20E-16       | 0.367          | 2.20E-16       | 0.440          | 2.20E-16       |
| <b>KDM1B</b>  | 0.428           | 2.20E-16       | 0.343          | 2.20E-16       | 0.419          | 2.20E-16       |
| <b>KDM5A</b>  | 0.425           | 2.20E-16       | 0.341          | 2.20E-16       | 0.494          | 2.20E-16       |
| <b>KDM8</b>   | 0.425           | 2.20E-16       | 0.341          | 2.20E-16       | 0.417          | 2.20E-16       |
| <b>KDM4D</b>  | 0.424           | 2.20E-16       | 0.341          | 2.20E-16       | 0.437          | 2.20E-16       |
| <b>KDM1A</b>  | 0.414           | 2.20E-16       | 0.338          | 2.20E-16       | 0.377          | 2.20E-16       |
| <b>KDM6B</b>  | 0.407           | 2.20E-16       | 0.327          | 2.20E-16       | 0.365          | 2.20E-16       |
| <b>JMJD1C</b> | 0.310           | 2.20E-16       | 0.245          | 2.20E-16       | 0.352          | 2.20E-16       |
| <b>KDM4B</b>  | 0.297           | 2.20E-16       | 0.233          | 2.20E-16       | 0.282          | 2.20E-16       |
| <b>MINA</b>   | 0.296           | 2.20E-16       | 0.236          | 2.20E-16       | 0.326          | 2.20E-16       |
| <b>KDM3A</b>  | 0.239           | 6.19E-14       | 0.191          | 6.95E-14       | 0.292          | 2.20E-16       |
| <b>KDM2B</b>  | 0.238           | 9.26E-14       | 0.189          | 8.59E-14       | 0.248          | 2.11E-14       |
| <b>KDM7A</b>  | 0.198           | 6.12E-10       | 0.156          | 6.99E-10       | 0.240          | 5.35E-14       |
| <b>KDM5C</b>  | 0.169           | 1.60E-07       | 0.134          | 1.26E-07       | 0.266          | 2.20E-16       |
| <b>KDM6A</b>  | 0.165           | 2.70E-07       | 0.131          | 2.57E-07       | 0.226          | 1.52E-12       |
| <b>KDM4E</b>  | 0.123           | 1.46E-04       | 0.106          | 1.34E-04       | 0.169          | 1.44E-07       |
| <b>PHF8</b>   | 0.104           | 1.25E-03       | 0.082          | 1.20E-03       | 0.149          | 3.54E-06       |

**Table S5. Comparison of mRNA expression between basal and non-basal breast cancer subtypes**

| <b>Gene</b> | <b>T-statistic</b> | <b>p-value</b> |
|-------------|--------------------|----------------|
| KDM1A       | 6.343              | 4.04E-09       |
| KDM1B       | 4.511              | 9.41E-06       |
| KDM2A       | -0.490             | 3.13E-01       |
| KDM2B       | 6.517              | 1.82E-09       |
| KDM3A       | 2.547              | 6.26E-03       |
| KDM3B       | -6.341             | 4.07E-09       |
| JMJD1C      | 1.514              | 6.67E-02       |
| KDM4A       | 2.626              | 5.05E-03       |
| KDM4B       | -14.937            | 9.56E-27       |
| KDM4C       | 4.015              | 6.01E-05       |
| KDM4D       | 5.358              | 3.04E-07       |
| KDM4E       | 3.199              | 9.44E-04       |
| KDM5A       | 3.234              | 8.45E-04       |
| KDM5B       | -0.045             | 4.82E-01       |
| KDM5C       | 1.510              | 6.72E-02       |
| KDM6A       | -4.207             | 2.98E-05       |
| KDM6B       | -1.951             | 2.70E-02       |
| KDM7A       | 0.929              | 1.78E-01       |
| PHF8        | -4.286             | 2.22E-05       |
| PHF2        | -1.997             | 2.44E-02       |
| MINA        | 4.544              | 8.28E-06       |
| NO66        | -3.174             | 1.02E-03       |
| KDM8        | -9.900             | 1.67E-16       |
| JARID2      | 2.914              | 2.23E-03       |

**Table S6. Summary of log-rank statistical analysis of overall survival correlated with expression levels of 24 KDMs in breast cancer**

| <b>Gene</b>   | <b>Chi Square</b> | <b>p-value</b> | <b>Hazard Ratio</b> | <b>95%CI</b>     |
|---------------|-------------------|----------------|---------------------|------------------|
| <b>MINA</b>   | 6.738             | 0.009          | 1.761               | 1.153 to 2.722   |
| <b>KDM6A</b>  | 6.894             | 0.009          | 1.745               | 1.173 to 2.810   |
| <b>KDM2A</b>  | 5.309             | 0.021          | 1.640               | 1.085 to 2.578   |
| <b>KDM3A</b>  | 4.003             | 0.045          | 1.547               | 1.011 to 2.383   |
| <b>KDM4E</b>  | 3.421             | 0.064          | 1.488               | 0.9825 to 2.317  |
| <b>KDM4D</b>  | 2.868             | 0.090          | 1.457               | 0.9454 to 2.227  |
| <b>JMJD1C</b> | 2.927             | 0.087          | 1.444               | 0.9517 to 2.251  |
| <b>KDM1B</b>  | 1.783             | 0.182          | 1.336               | 0.8732 to 2.059  |
| <b>JARID2</b> | 1.483             | 0.223          | 1.299               | 0.8525 to 2.02   |
| <b>PHF8</b>   | 1.398             | 0.237          | 1.291               | 0.8431 to 2.017  |
| <b>KDM3B</b>  | 1.356             | 0.244          | 1.287               | 0.8407 to 1.987  |
| <b>KDM5B</b>  | 1.049             | 0.306          | 1.249               | 0.8150 to 1.927  |
| <b>KDM5A</b>  | 0.604             | 0.437          | 1.182               | 0.7716 to 1.840  |
| <b>KDM5C</b>  | 0.379             | 0.538          | 1.143               | 0.7460 to 1.756  |
| <b>KDM7A</b>  | 0.000             | 0.992          | 0.998               | 0.6493 to 1.533  |
| <b>KDM6B</b>  | 0.019             | 0.891          | 0.971               | 0.6322 to 1.49   |
| <b>KDM4C</b>  | 0.288             | 0.591          | 0.890               | 0.5794 to 1.364  |
| <b>PHF2</b>   | 0.543             | 0.461          | 0.852               | 0.5538 to 1.306  |
| <b>KDM8</b>   | 0.579             | 0.447          | 0.848               | 0.5516 to 1.298  |
| <b>KDM2B</b>  | 0.683             | 0.409          | 0.834               | 0.5436 to 1.280  |
| <b>KDM4A</b>  | 1.485             | 0.223          | 0.764               | 0.4985 to 1.174  |
| <b>KDM1A</b>  | 2.012             | 0.156          | 0.739               | 0.4703 to 1.121  |
| <b>NO66</b>   | 2.810             | 0.094          | 0.696               | 0.4488 to 1.061  |
| <b>KDM4B</b>  | 10.710            | 0.001          | 0.488               | 0.3158 to 0.7454 |

**Table S7. Summary of log-rank statistical analysis of overall survival correlated with expression levels of 24 KDMs in Luminal breast cancer**

| <b>Gene</b>   | <b>Chi-Square</b> | <b>p-value</b> | <b>Hazard Ratio</b> | <b>95% CI</b>    |
|---------------|-------------------|----------------|---------------------|------------------|
| <b>MINA</b>   | 4.974             | 0.0257         | 2.051               | 1.100 to 3.976   |
| <b>KDM4E</b>  | 4.549             | 0.0329         | 1.961               | 1.082 to 3.897   |
| <b>KDM5A</b>  | 3.607             | 0.0575         | 1.814               | 0.9930 to 3.681  |
| <b>KDM3B</b>  | 3.547             | 0.0596         | 1.808               | 0.9858 to 3.652  |
| <b>KDM2A</b>  | 2.726             | 0.0987         | 1.715               | 0.9063 to 3.240  |
| <b>KDM6A</b>  | 2.363             | 0.1242         | 1.628               | 0.8762 to 3.199  |
| <b>PHF8</b>   | 1.482             | 0.2235         | 1.475               | 0.7836 to 2.907  |
| <b>KDM3A</b>  | 1.360             | 0.2435         | 1.458               | 0.7757 to 2.769  |
| <b>JARID2</b> | 1.029             | 0.3103         | 1.392               | 0.7366 to 2.628  |
| <b>PHF2</b>   | 0.813             | 0.3672         | 1.351               | 0.7084 to 2.550  |
| <b>KDM1B</b>  | 0.627             | 0.4284         | 1.289               | 0.6844 to 2.467  |
| <b>JMJD1C</b> | 0.569             | 0.4506         | 1.273               | 0.6766 to 2.436  |
| <b>KDM2B</b>  | 0.231             | 0.6305         | 1.167               | 0.6154 to 2.242  |
| <b>KDM7A</b>  | 0.002             | 0.9686         | 1.013               | 0.5238 to 1.962  |
| <b>KDM4D</b>  | 0.094             | 0.7587         | 0.907               | 0.4767 to 1.712  |
| <b>KDM5C</b>  | 0.127             | 0.7218         | 0.891               | 0.4711 to 1.683  |
| <b>KDM4C</b>  | 0.148             | 0.7004         | 0.883               | 0.4663 to 1.665  |
| <b>KDM5B</b>  | 0.264             | 0.6077         | 0.846               | 0.4479 to 1.598  |
| <b>KDM4A</b>  | 0.350             | 0.5543         | 0.823               | 0.4343 to 1.563  |
| <b>KDM6B</b>  | 0.738             | 0.3903         | 0.757               | 0.3999 to 1.428  |
| <b>KDM8</b>   | 1.382             | 0.2398         | 0.688               | 0.3560 to 1.285  |
| <b>KDM1A</b>  | 3.261             | 0.0710         | 0.569               | 0.2763 to 1.037  |
| <b>NO66</b>   | 8.765             | 0.0031         | 0.403               | 0.1825 to 0.6883 |
| <b>KDM4B</b>  | 8.712             | 0.0032         | 0.365               | 0.2017 to 0.7209 |

**Table S8. Summary of log-rank statistical analysis of overall survival correlated with expression levels of 24 KDMs in basal breast cancer**

| <b>Gene</b>   | <b>Chi-Square</b> | <b>p-value</b> | <b>Hazard Ratio</b> | <b>95% CI</b>   |
|---------------|-------------------|----------------|---------------------|-----------------|
| <b>KDM6B</b>  | 1.688             | 0.1939         | 2.199               | 0.6734 to 7.271 |
| <b>KDM4B</b>  | 1.649             | 0.1990         | 2.189               | 0.6645 to 7.170 |
| <b>JARID2</b> | 1.575             | 0.2095         | 2.146               | 0.6549 to 7.049 |
| <b>JMJD1C</b> | 1.285             | 0.2570         | 2.106               | 0.6084 to 6.576 |
| <b>KDM7A</b>  | 1.155             | 0.2826         | 1.924               | 0.5900 to 6.289 |
| <b>KDM3A</b>  | 0.635             | 0.4255         | 1.631               | 0.4985 to 5.307 |
| <b>KDM1A</b>  | 0.343             | 0.5584         | 1.411               | 0.4277 to 4.938 |
| <b>KDM6A</b>  | 0.202             | 0.6534         | 1.321               | 0.3994 to 4.347 |
| <b>KDM4D</b>  | 0.033             | 0.8564         | 1.115               | 0.3384 to 3.690 |
| <b>MINA</b>   | 0.014             | 0.9051         | 1.075               | 0.3291 to 3.511 |
| <b>KDM5B</b>  | 0.007             | 0.9327         | 0.950               | 0.2906 to 3.106 |
| <b>NO66</b>   | 0.014             | 0.9072         | 0.932               | 0.2829 to 3.065 |
| <b>KDM4C</b>  | 0.019             | 0.8904         | 0.919               | 0.2637 to 3.174 |
| <b>KDM1B</b>  | 0.028             | 0.8677         | 0.905               | 0.2769 to 2.950 |
| <b>KDM4E</b>  | 0.047             | 0.8275         | 0.877               | 0.2688 to 2.860 |
| <b>KDM5C</b>  | 0.054             | 0.8159         | 0.870               | 0.2617 to 2.869 |
| <b>PHF8</b>   | 0.180             | 0.6713         | 0.778               | 0.2284 to 2.568 |
| <b>KDM3B</b>  | 0.416             | 0.5191         | 0.679               | 0.2059 to 2.217 |
| <b>PHF2</b>   | 0.712             | 0.3988         | 0.605               | 0.1800 to 1.973 |
| <b>KDM8</b>   | 0.808             | 0.3687         | 0.588               | 0.1725 to 1.901 |
| <b>KDM2A</b>  | 1.075             | 0.2999         | 0.530               | 0.1634 to 1.740 |
| <b>KDM4A</b>  | 2.207             | 0.1374         | 0.382               | 0.1247 to 1.326 |
| <b>KDM5A</b>  | 4.007             | 0.0453         | 0.309               | 0.081 to 0.965  |
| <b>KDM2B</b>  | 3.545             | 0.0597         | 0.303               | 0.0967 to 1.042 |

**Table S9. Summary of multivariate analysis of overall survival for 24KDM expressions in breast cancer**

|                    |                   |                   |                   |                   |                   |                   |                   |                    |                   |
|--------------------|-------------------|-------------------|-------------------|-------------------|-------------------|-------------------|-------------------|--------------------|-------------------|
| Multivariate       | JARID2            | Age               | ER Status         | PR Status         | HER2 Status       | Tumor Size        | Lymph Node        | Metastasis         | PAM50 Subtype     |
| Hazard Ratio       | 2.43519           | 1.04036           | 0.55571           | 0.31282           | 0.38206           | 0.97246           | 1.87462           | 3.07427            | 0.50462           |
| P-value            | 0.00923           | 0.00218           | 0.31085           | 0.01094           | 0.15655           | 0.94667           | 0.08435           | 0.02982            | 0.21853           |
| 95% Conf. Interval | 1.2461<br>4.7591  | 1.0144<br>1.067   | 0.1784<br>1.731   | 0.1278<br>0.7657  | 0.1009<br>1.4462  | 0.4291<br>2.204   | 0.9183<br>3.8267  | 1.1161<br>8.4677   | 0.1698<br>1.5001  |
| Multivariate       | JMJD1C            | Age               | ER Status         | PR Status         | HER2 Status       | Tumor Size        | Lymph Node        | Metastasis         | PAM50 Subtype     |
| Hazard Ratio       | 2.21902           | 1.03347           | 0.65943           | 0.23172           | 0.37433           | 1.1224            | 1.70523           | 3.42194            | 0.4292            |
| P-value            | 0.02642           | 0.00863           | 0.46613           | 0.00198           | 0.14638           | 0.78078           | 0.1426            | 0.02494            | 0.13549           |
| 95% Conf. Interval | 1.09786<br>4.4852 | 1.00839<br>1.0592 | 0.21521<br>2.0206 | 0.09176<br>0.5852 | 0.0994<br>1.4097  | 0.49771<br>2.5312 | 0.83548<br>3.4804 | 1.16759<br>10.0289 | 0.14137<br>1.3031 |
| Multivariate       | NO66              | Age               | ER Status         | PR Status         | HER2 Status       | Tumor Size        | Lymph Node        | Metastasis         | PAM50 Subtype     |
| Hazard Ratio       | 0.53487           | 1.03218           | 0.54308           | 0.34169           | 0.40033           | 1.06065           | 1.90377           | 2.24401            | 0.46379           |
| P-value            | 0.0564            | 0.011             | 0.3017            | 0.018             | 0.1688            | 0.8866            | 0.0744            | 0.1061             | 0.1742            |
| 95% Conf. Interval | 0.2812<br>1.0173  | 1.0073<br>1.0577  | 0.1705<br>1.7299  | 0.1404<br>0.8317  | 0.1087<br>1.4745  | 0.4723<br>2.3817  | 0.9386<br>3.8614  | 0.8418<br>5.9818   | 0.1531<br>1.4048  |
| Multivariate       | KDM1A             | Age               | ER Status         | PR Status         | HER2 Status       | Tumor Size        | Lymph Node        | Metastasis         | PAM50 Subtype     |
| Hazard Ratio       | 0.83384           | 1.03396           | 0.67202           | 0.27722           | 0.4441            | 1.0593            | 1.89974           | 2.20327            | 0.58837           |
| P-value            | 0.58635           | 0.00924           | 0.49365           | 0.00477           | 0.2218            | 0.89189           | 0.08463           | 0.1105             | 0.34287           |
| 95% Conf. Interval | 0.4333<br>1.6045  | 1.0083<br>1.0603  | 0.2153<br>2.0972  | 0.1137<br>0.6757  | 0.1208<br>1.633   | 0.4616<br>2.431   | 0.9161<br>3.9396  | 0.8351<br>5.8128   | 0.1966<br>1.7605  |
| Multivariate       | KDM1B             | Age               | ER Status         | PR Status         | HER2 Status       | Tumor Size        | Lymph Node        | Metastasis         | PAM50 Subtype     |
| Hazard Ratio       | 1.15836           | 1.0331            | 0.68741           | 0.27815           | 0.43511           | 1.07392           | 1.90575           | 2.31439            | 0.54106           |
| P-value            | 0.65626           | 0.01226           | 0.5194            | 0.00503           | 0.21196           | 0.86521           | 0.08307           | 0.10204            | 0.27858           |
| 95% Conf. Interval | 0.6063<br>2.213   | 1.0071<br>1.0598  | 0.2198<br>2.15    | 0.1138<br>0.6801  | 0.1178<br>1.6072  | 0.4713<br>2.4469  | 0.9191<br>3.9517  | 0.8464<br>6.3284   | 0.1781<br>1.6435  |
| Multivariate       | KDM2A             | Age               | ER Status         | PR Status         | HER2 Status       | Tumor Size        | Lymph Node        | Metastasis         | PAM50 Subtype     |
| Hazard Ratio       | 1.24313           | 1.03464           | 0.62387           | 0.29241           | 0.42539           | 1.0868            | 1.90088           | 2.29054            | 0.52311           |
| P-value            | 0.49788           | 0.00745           | 0.42828           | 0.00653           | 0.20297           | 0.84243           | 0.08108           | 0.09808            | 0.26121           |
| 95% Conf. Interval | 0.6625<br>2.3325  | 1.0092<br>1.0608  | 0.1941<br>2.0048  | 0.1206<br>0.7093  | 0.1141<br>1.5859  | 0.4783<br>2.4693  | 0.9237<br>3.9118  | 0.858<br>6.1149    | 0.1689<br>1.6199  |
| Multivariate       | KDM2B             | Age               | ER Status         | PR Status         | HER2 Status       | Tumor Size        | Lymph Node        | Metastasis         | PAM50 Subtype     |
| Hazard Ratio       | 0.88944           | 1.03509           | 0.709             | 0.27192           | 0.44263           | 1.09522           | 2.00124           | 2.11326            | 0.60619           |
| P-value            | 0.74774           | 0.00876           | 0.56427           | 0.0061            | 0.21975           | 0.82993           | 0.0635            | 0.13945            | 0.39588           |
| 95% Conf. Interval | 0.4355<br>1.8164  | 1.0087<br>1.0621  | 0.2202<br>2.2825  | 0.1072<br>0.6897  | 0.1204<br>1.6269  | 0.4776<br>2.5116  | 0.9618<br>4.1642  | 0.7834<br>5.7006   | 0.1909<br>1.9251  |
| Multivariate       | KDM3A             | Age               | ER Status         | PR Status         | HER2 Status       | Tumor Size        | Lymph Node        | Metastasis         | PAM50 Subtype     |
| Hazard Ratio       | 1.50506           | 1.03336           | 0.73807           | 0.28635           | 0.47326           | 1.08188           | 1.96082           | 2.38079            | 0.56797           |
| P-value            | 0.19344           | 0.01              | 0.59434           | 0.00611           | 0.25948           | 0.85335           | 0.06714           | 0.08167            | 0.29929           |
| 95% Conf. Interval | 0.8128<br>2.7871  | 1.0079<br>1.0595  | 0.2414<br>2.257   | 0.1171<br>0.7001  | 0.1289<br>1.7371  | 0.4696<br>2.4922  | 0.9536<br>4.032   | 0.8967<br>6.3213   | 0.1952<br>1.6528  |
| Multivariate       | KDM3B             | Age               | ER Status         | PR Status         | HER2 Status       | Tumor Size        | Lymph Node        | Metastasis         | PAM50 Subtype     |
| Hazard Ratio       | 1.18545           | 1.03377           | 0.69269           | 0.28737           | 0.48847           | 1.09121           | 1.92802           | 2.37265            | 0.61024           |
| P-value            | 0.60756           | 0.00988           | 0.52695           | 0.0057            | 0.2963            | 0.83579           | 0.07445           | 0.09873            | 0.38698           |
| 95% Conf. Interval | 0.6193<br>2.2691  | 1.008<br>1.0602   | 0.2221<br>2.1604  | 0.1187<br>0.6956  | 0.1273<br>1.874   | 0.478<br>2.4908   | 0.9372<br>3.9662  | 0.8507<br>6.6173   | 0.1993<br>1.8684  |
| Multivariate       | KDM4A             | Age               | ER Status         | PR Status         | HER2 Status       | Tumor Size        | Lymph Node        | Metastasis         | PAM50 Subtype     |
| Hazard Ratio       | 0.86382           | 1.03339           | 0.65819           | 0.28495           | 0.44498           | 1.06889           | 1.92643           | 2.14621            | 0.56342           |
| P-value            | 0.65227           | 0.01118           | 0.47621           | 0.00568           | 0.22301           | 0.87387           | 0.07425           | 0.12684            | 0.30524           |
| 95% Conf. Interval | 0.457<br>1.6329   | 1.0075<br>1.0599  | 0.2083<br>2.0802  | 0.117<br>0.6937   | 0.121<br>1.6367   | 0.4696<br>2.4332  | 0.9378<br>3.9574  | 0.8051<br>5.721    | 0.1882<br>1.6872  |
| Multivariate       | KDM4B             | Age               | ER Status         | PR Status         | HER2 Status       | Tumor Size        | Lymph Node        | Metastasis         | PAM50 Subtype     |
| Hazard Ratio       | 0.32166           | 1.03383           | 0.51778           | 0.43025           | 0.33036           | 1.16317           | 1.43898           | 2.62448            | 0.31662           |
| P-value            | 0.00319           | 0.00626           | 0.2871            | 0.07514           | 0.11324           | 0.71805           | 0.34258           | 0.0633             | 0.05688           |
| 95% Conf. Interval | 0.15134<br>0.6837 | 1.00946<br>1.0588 | 0.15411<br>1.7397 | 0.16995<br>1.0892 | 0.08389<br>1.3009 | 0.51205<br>2.6423 | 0.67866<br>3.0511 | 0.94794<br>7.2662  | 0.09693<br>1.0342 |

|                    |         |          |           |           |             |            |            |            |               |
|--------------------|---------|----------|-----------|-----------|-------------|------------|------------|------------|---------------|
| Multivariate       | KDM4C   | Age      | ER Status | PR Status | HER2 Status | Tumor Size | Lymph Node | Metastasis | PAM50 Subtype |
| Hazard Ratio       | 0.82579 | 1.03533  | 0.66498   | 0.30219   | 0.45316     | 1.06154    | 1.98597    | 2.14497    | 0.63544       |
| P-value            | 0.5657  | 0.0077   | 0.4796    | 0.0097    | 0.2324      | 0.8881     | 0.0637     | 0.1276     | 0.4369        |
| 95% Conf. Interval | 0.4298  | 1.0092   | 0.2145    | 0.122     | 0.1236      | 0.4621     | 0.9616     | 0.8036     | 0.2026        |
|                    | 1.5867  | 1.0621   | 2.0611    | 0.7484    | 1.6612      | 2.4387     | 4.1015     | 5.7254     | 1.9932        |
| Multivariate       | KDM4D   | Age      | ER Status | PR Status | HER2 Status | Tumor Size | Lymph Node | Metastasis | PAM50 Subtype |
| Hazard Ratio       | 1.13232 | 1.03456  | 0.64815   | 0.28689   | 0.43186     | 1.10631    | 1.91428    | 2.23558    | 0.52751       |
| P-value            | 0.71072 | 0.00824  | 0.46516   | 0.00561   | 0.21061     | 0.81201    | 0.08115    | 0.10844    | 0.28387       |
| 95% Conf. Interval | 0.5872  | 1.0088   | 0.2024    | 0.1186    | 0.116       | 0.4812     | 0.9228     | 0.8371     | 0.1638        |
|                    | 2.1836  | 1.061    | 2.0752    | 0.6942    | 1.6078      | 2.5436     | 3.9712     | 5.9702     | 1.6992        |
| Multivariate       | KDM4E   | Age      | ER Status | PR Status | HER2 Status | Tumor Size | Lymph Node | Metastasis | PAM50 Subtype |
| Hazard Ratio       | 0.99784 | 1.034295 | 0.676888  | 0.284759  | 0.444119    | 1.081376   | 1.959729   | 2.179276   | 0.568875      |
| P-value            | 0.99461 | 0.00886  | 0.51392   | 0.00611   | 0.22272     | 0.85272    | 0.06928    | 0.13081    | 0.31779       |
| 95% Conf. Interval | 0.5327  | 1.0085   | 0.2097    | 0.116     | 0.1205      | 0.4734     | 0.9483     | 0.7933     | 0.1881        |
|                    | 1.869   | 1.0607   | 2.1848    | 0.6989    | 1.6372      | 2.4699     | 4.05       | 5.9865     | 1.7205        |
| Multivariate       | KDM5A   | Age      | ER Status | PR Status | HER2 Status | Tumor Size | Lymph Node | Metastasis | PAM50 Subtype |
| Hazard Ratio       | 0.87201 | 1.03558  | 0.66682   | 0.29419   | 0.43591     | 1.093      | 2.01896    | 2.0615     | 0.61205       |
| P-value            | 0.70457 | 0.00868  | 0.48822   | 0.00769   | 0.21349     | 0.83364    | 0.06236    | 0.16519    | 0.40534       |
| 95% Conf. Interval | 0.4296  | 1.0089   | 0.212     | 0.1196    | 0.1178      | 0.4767     | 0.9644     | 0.7421     | 0.1926        |
|                    | 1.7701  | 1.063    | 2.0973    | 0.7234    | 1.6126      | 2.5061     | 4.2268     | 5.7265     | 1.9453        |
| Multivariate       | KDM5B   | Age      | ER Status | PR Status | HER2 Status | Tumor Size | Lymph Node | Metastasis | PAM50 Subtype |
| Hazard Ratio       | 0.74234 | 1.03678  | 0.60352   | 0.30563   | 0.43575     | 1.06866    | 2.03428    | 2.19195    | 0.56635       |
| P-value            | 0.34951 | 0.00597  | 0.40778   | 0.00954   | 0.21884     | 0.87417    | 0.05435    | 0.11943    | 0.32059       |
| 95% Conf. Interval | 0.3977  | 1.0104   | 0.1826    | 0.1247    | 0.1159      | 0.4698     | 0.9868     | 0.8163     | 0.1844        |
|                    | 1.3858  | 1.0638   | 1.9949    | 0.7489    | 1.6379      | 2.4309     | 4.1936     | 5.8861     | 1.7391        |
| Multivariate       | KDM5C   | Age      | ER Status | PR Status | HER2 Status | Tumor Size | Lymph Node | Metastasis | PAM50 Subtype |
| Hazard Ratio       | 0.94091 | 1.03412  | 0.67723   | 0.28863   | 0.44281     | 1.09319    | 1.96409    | 2.19633    | 0.57965       |
| P-value            | 0.84765 | 0.00902  | 0.50347   | 0.00654   | 0.22071     | 0.83415    | 0.06653    | 0.11572    | 0.33641       |
| 95% Conf. Interval | 0.5055  | 1.0084   | 0.2162    | 0.1179    | 0.1202      | 0.4747     | 0.955      | 0.824      | 0.1907        |
|                    | 1.7514  | 1.0605   | 2.1213    | 0.7068    | 1.6309      | 2.5173     | 4.0394     | 5.854      | 1.7622        |
| Multivariate       | KDM6A   | Age      | ER Status | PR Status | HER2 Status | Tumor Size | Lymph Node | Metastasis | PAM50 Subtype |
| Hazard Ratio       | 1.63844 | 1.03147  | 0.59379   | 0.2812    | 0.43113     | 1.11304    | 1.75191    | 2.65272    | 0.52504       |
| P-value            | 0.13258 | 0.01641  | 0.37046   | 0.00561   | 0.2033      | 0.79651    | 0.12929    | 0.05539    | 0.24948       |
| 95% Conf. Interval | 0.861   | 1.0057   | 0.1898    | 0.1146    | 0.1179      | 0.4932     | 0.8489     | 0.9778     | 0.1754        |
|                    | 3.118   | 1.0579   | 1.8579    | 0.6901    | 1.5759      | 2.512      | 3.6153     | 7.1969     | 1.5718        |
| Multivariate       | KDM6B   | Age      | ER Status | PR Status | HER2 Status | Tumor Size | Lymph Node | Metastasis | PAM50 Subtype |
| Hazard Ratio       | 0.62547 | 1.03492  | 0.64286   | 0.27931   | 0.43747     | 1.07486    | 1.90339    | 2.28801    | 0.47435       |
| P-value            | 0.13609 | 0.00736  | 0.46651   | 0.00541   | 0.21452     | 0.86404    | 0.08119    | 0.10532    | 0.20465       |
| 95% Conf. Interval | 0.3375  | 1.0093   | 0.1957    | 0.1137    | 0.1186      | 0.4705     | 0.9233     | 0.8403     | 0.1498        |
|                    | 1.159   | 1.061    | 2.112     | 0.686     | 1.614       | 2.456      | 3.924      | 6.23       | 1.502         |
| Multivariate       | KDM7A   | Age      | ER Status | PR Status | HER2 Status | Tumor Size | Lymph Node | Metastasis | PAM50 Subtype |
| Hazard Ratio       | 0.83034 | 1.03501  | 0.67588   | 0.28535   | 0.45661     | 1.08083    | 2.01477    | 2.16607    | 0.59562       |
| P-value            | 0.56344 | 0.00803  | 0.49957   | 0.00542   | 0.24017     | 0.85458    | 0.06038    | 0.119      | 0.35896       |
| 95% Conf. Interval | 0.4419  | 1.009    | 0.2168    | 0.1179    | 0.1234      | 0.4707     | 0.9699     | 0.8197     | 0.1969        |
|                    | 1.5602  | 1.0617   | 2.1074    | 0.6906    | 1.6891      | 2.4817     | 4.1852     | 5.7238     | 1.8021        |
| Multivariate       | KDM8    | Age      | ER Status | PR Status | HER2 Status | Tumor Size | Lymph Node | Metastasis | PAM50 Subtype |
| Hazard Ratio       | 0.62123 | 1.03557  | 0.65457   | 0.25856   | 0.40022     | 1.02559    | 2.00367    | 2.13494    | 0.44208       |
| P-value            | 0.14165 | 0.00608  | 0.45745   | 0.0034    | 0.16526     | 0.95133    | 0.05662    | 0.12505    | 0.15273       |
| 95% Conf. Interval | 0.3293  | 1.01     | 0.2141    | 0.1046    | 0.1098      | 0.4555     | 0.9806     | 0.8101     | 0.1444        |
|                    | 1.1721  | 1.0618   | 2.0017    | 0.6392    | 1.459       | 2.309      | 4.0941     | 5.6268     | 1.3533        |
| Multivariate       | MINA    | Age      | ER Status | PR Status | HER2 Status | Tumor Size | Lymph Node | Metastasis | PAM50 Subtype |
| Hazard Ratio       | 1.61375 | 1.03329  | 0.68555   | 0.29061   | 0.3768      | 1.0835     | 1.76076    | 2.15442    | 0.47846       |
| P-value            | 0.15262 | 0.01008  | 0.51957   | 0.00684   | 0.14706     | 0.84705    | 0.12571    | 0.12824    | 0.19644       |
| 95% Conf. Interval | 0.8376  | 1.0078   | 0.2173    | 0.1187    | 0.1007      | 0.4796     | 0.8535     | 0.8013     | 0.1563        |
|                    | 3.1091  | 1.0594   | 2.1629    | 0.7116    | 1.4096      | 2.4476     | 3.6324     | 5.7922     | 1.4642        |

|                    |         |         |           |           |             |            |            |            |               |
|--------------------|---------|---------|-----------|-----------|-------------|------------|------------|------------|---------------|
| Multivariate       | PHF2    | Age     | ER Status | PR Status | HER2 Status | Tumor Size | Lymph Node | Metastasis | PAM50 Subtype |
| Hazard Ratio       | 0.89605 | 1.03464 | 0.66812   | 0.28097   | 0.41916     | 1.08178    | 1.93198    | 2.16683    | 0.54265       |
| P-value            | 0.73375 | 0.00839 | 0.48877   | 0.00522   | 0.20607     | 0.85163    | 0.07376    | 0.12019    | 0.28855       |
| 95% Conf. Interval | 0.476   | 1.0088  | 0.2133    | 0.1153    | 0.1089      | 0.4747     | 0.9387     | 0.8171     | 0.1755        |
|                    | 1.6866  | 1.0612  | 2.0928    | 0.6847    | 1.6133      | 2.4653     | 3.9764     | 5.7464     | 1.678         |
| Multivariate       | PHF8    | Age     | ER Status | PR Status | HER2 Status | Tumor Size | Lymph Node | Metastasis | PAM50 Subtype |
| Hazard Ratio       | 0.98277 | 1.03443 | 0.67924   | 0.28449   | 0.44344     | 1.08536    | 1.95029    | 2.18714    | 0.5684        |
| P-value            | 0.95907 | 0.00984 | 0.51041   | 0.00552   | 0.22216     | 0.84813    | 0.07711    | 0.11813    | 0.31099       |
| 95% Conf. Interval | 0.506   | 1.0082  | 0.2147    | 0.1171    | 0.1202      | 0.4693     | 0.9299     | 0.8196     | 0.1906        |
|                    | 1.9089  | 1.0614  | 2.1489    | 0.6912    | 1.6362      | 2.51       | 4.0902     | 5.8366     | 1.6954        |

**Table S10. Relative expression level of 24 KDM genes in 18 breast cancer cell lines**

| Cell line  | KDM1A | KDM1B | KDM2A | KDM2B | KDM3A | KDM3B | JMJD1C | KDM4A | KDM4B | KDM4C | KDM4D | KDM4E | KDM5A | KDM5B | KDM5C | KDM6A | KDM6B | KDM7A | PFH8  | PFH2  | MINA  | NO66  | KDM8  | JARID2 |
|------------|-------|-------|-------|-------|-------|-------|--------|-------|-------|-------|-------|-------|-------|-------|-------|-------|-------|-------|-------|-------|-------|-------|-------|--------|
| SUM1315    | -0.24 | -1.49 | -1.04 | 0.36  | 0.85  | -0.29 | -0.23  | 1.03  | -2.90 | -0.08 | -1.31 | 3.62  | 0.13  | 0.94  | 0.01  | -0.46 | -1.38 | -1.79 | -0.71 | -0.85 | 0.45  | 0.31  | 1.25  | -0.52  |
| SUM102     | 0.75  | -0.38 | 0.80  | -1.34 | -0.29 | -0.39 | -0.05  | -0.41 | -1.40 | 0.74  | 1.21  | 0.00  | 0.94  | 1.10  | -0.39 | -0.03 | -0.03 | 0.66  | 0.10  | -0.53 | 0.06  | 0.56  | 1.69  | 0.70   |
| SUM159     | -0.50 | -1.33 | -1.31 | 0.91  | 0.50  | -1.36 | 0.15   | -0.34 | -0.73 | -0.25 | 2.40  | 3.25  | -0.29 | -0.09 | 0.20  | -0.77 | -1.49 | -0.94 | -0.46 | -0.73 | 0.33  | 0.04  | 1.79  | -0.40  |
| Colo824    | 0.88  | 0.02  | 0.53  | 2.45  | 1.62  | 2.02  | 1.33   | 0.91  | 1.92  | 4.61  | 3.30  | 6.24  | 1.65  | 3.12  | 1.40  | 0.35  | 0.45  | 2.09  | 1.58  | 1.35  | 0.26  | 1.68  | -0.09 | 5.32   |
| SUM229     | -1.34 | -1.00 | -0.78 | 0.31  | 0.36  | -1.53 | -1.79  | -0.61 | -1.55 | 0.29  | 1.65  | -1.50 | -2.34 | -0.12 | -0.93 | -0.57 | -0.28 | -1.19 | -0.85 | -0.32 | -1.74 | -1.69 | 0.92  | -0.69  |
| SUM149     | -0.47 | 0.12  | 0.38  | 0.29  | 0.52  | -1.48 | -0.46  | 0.33  | -1.83 | 1.81  | 1.19  |       | -0.56 | -0.94 | -1.31 | -1.24 | 0.56  | -1.61 | -0.81 | 0.06  | 0.37  | -0.34 | -1.58 | 0.39   |
| HCC70      | -1.01 | -1.21 | -1.00 | 0.32  | -0.40 | -1.62 | -1.19  | -0.07 | -1.09 | 0.67  | -0.61 | -0.82 | -2.15 | 0.84  | -0.86 | -1.43 | -1.33 | -0.25 | -1.28 | -1.25 | -0.12 | -0.93 | -0.03 | -0.97  |
| HCC1937    | 0.15  | 0.04  | 0.76  | 0.74  | -0.58 | -0.81 | -0.81  | 0.36  | 0.67  | 0.17  | 1.29  |       | 1.87  | 0.99  | -1.18 | 0.07  | 0.03  | -2.76 | -0.96 | 0.14  | 0.47  | 0.56  | 0.52  | 0.98   |
| MDA-MB-468 | 0.16  | 0.01  | 0.15  | 1.49  | 0.12  | -0.87 | 1.02   | 1.50  | 0.09  | 1.38  | 1.12  | 5.88  | 0.01  | 1.27  | 0.89  | 0.73  | 0.39  | -1.16 | 1.20  | -0.22 | 0.54  | 1.52  | 2.43  | 1.97   |
| HCC1954    | 0.34  | -0.63 | 0.26  | -0.15 | 0.32  | -0.62 | -0.39  | 0.30  | -1.58 | 2.60  | 3.31  | 4.05  | 0.10  | 0.54  | 2.03  | 1.15  | 0.28  | 0.31  | 0.69  | -0.03 | -0.45 | 0.39  | 0.30  | 1.12   |
| SUM190     | -0.39 | 0.36  | -0.34 | 1.04  | 0.41  | -0.70 | 0.41   | -0.58 | -1.15 | 0.21  | 1.92  | 0.69  | -1.31 | 1.15  | 1.19  | 0.83  | 2.10  | 2.67  | 1.05  | -0.19 | 0.10  | -0.33 | -0.17 | 1.11   |
| SUM225     | -2.63 | 0.16  | 0.56  | -0.20 | -0.71 | -1.23 | -0.35  | 1.33  | 0.24  | -0.51 | 1.03  | 1.24  | -2.54 | 1.12  | -0.18 | -1.18 | 0.56  | 0.69  | -0.88 | -0.66 | -0.97 | -0.94 | 0.85  | -0.78  |
| HCC1428    | -0.43 | 0.37  | 1.00  | 0.78  | 1.03  | -0.70 | -0.39  | 1.38  | 3.55  | -1.38 | 0.56  | 6.47  | 0.28  | 0.63  | 1.37  | 1.29  | 0.77  | 1.47  | 0.70  | 0.28  | -0.94 | -0.28 | 0.80  | 1.01   |
| SUM44      | -1.01 | 1.66  | 2.36  | 2.54  | 2.03  | 0.27  | 0.47   | 0.39  | 3.50  | -0.05 | 0.61  | 2.19  | 0.40  | 2.89  | 1.38  | 1.86  | 1.50  | 0.99  | 1.76  | 0.35  | -1.74 | 1.11  | 2.78  | 0.49   |
| SUM52      | -1.30 | -0.67 | 1.05  | 0.16  | -0.37 | -0.73 | -0.69  | 0.39  | 2.28  | -0.98 | 0.81  | -0.48 | -1.64 | 0.65  | 0.28  | -1.60 | 1.15  | 0.59  | -0.43 | -0.89 | -0.81 | -1.23 | 0.14  | -1.64  |
| T47D       | -1.59 | -0.13 | 1.37  | 2.86  | -0.08 | -0.46 | 0.06   | 0.66  | 3.98  | -0.36 | 2.38  | 2.72  | -1.35 | 3.35  | 1.34  | 1.31  | 1.03  | 2.19  | 1.00  | -0.66 | -0.68 | 0.90  | 2.07  | 0.12   |
| SUM185     | -0.77 | -0.75 | 0.33  | 0.36  | 1.45  | -0.31 | 1.66   | 0.14  | 2.53  | 0.38  | 0.79  | 5.45  | -0.07 | 3.16  | 1.19  | 2.38  | 3.47  | 2.44  | 0.32  | 1.08  | -0.33 | -0.50 | 0.80  | 0.28   |
| ZR75-1     | -2.24 | -0.79 | 2.09  | 1.49  | 0.78  | -0.26 | 1.65   | 0.00  | -0.07 | 1.15  | 0.02  | 1.44  | -0.28 | 3.44  | 1.26  | 2.15  | 2.85  | 2.23  | 0.56  | -0.22 | 0.56  | 1.24  | 2.20  | 0.50   |

Footnote: Expression level of KDM genes was detected by quantitative RT-PCR assays in 18 breast cancer cell lines. Basal-type cell lines are colored in red; HER2+ in green, and Luminal in blue. The log2 transformed expression level of each gene in one breast cancer cell line is relative to its abundance in the MCF10A cell line. Log2 ratio greater than 1.0 was highlighted in red, less than -1.0 in green.

**Table S11. Upregulated and downregulated genes after KDM2A knockdown in ZR75-1 breast cancer cells**

| Tracking_id | Gene_short_name         | FPKM_sh_#1 | FPKM_sh_#3 | FPKM_shRNA_Ctrl | log2(sh_1/sh-Ctrl) | log2(sh_3/sh-Ctrl) |
|-------------|-------------------------|------------|------------|-----------------|--------------------|--------------------|
| XLOC_023331 | SNORD90                 | 2,048.12   | 292.79     | 0.00            | 44.22              | 41.41              |
| XLOC_004227 | SNORD67                 | 643.14     | 65.68      | 0.00            | 42.55              | 39.26              |
| XLOC_014802 | RNU12                   | 400.38     | 12.46      | 0.00            | 41.86              | 36.86              |
| XLOC_007034 | RTL1                    | 154.07     | 0.63       | 0.00            | 40.49              | 32.56              |
| XLOC_024176 | LOC550643               | 20.63      | 38.07      | 0.00            | 37.59              | 38.47              |
| XLOC_020709 | VWC2                    | 4.42       | 1.25       | 0.00            | 35.36              | 33.54              |
| XLOC_010930 | UPK1A                   | 3.26       | 3.90       | 0.00            | 34.92              | 35.18              |
| XLOC_011958 | SLC17A7                 | 3.11       | 0.70       | 0.00            | 34.86              | 32.70              |
| XLOC_010083 | UNC13D                  | 2.76       | 0.69       | 0.00            | 34.68              | 32.68              |
| XLOC_013713 | SNAP25                  | 1.93       | 0.29       | 0.00            | 34.17              | 31.45              |
| XLOC_011822 | GRIK5                   | 1.59       | 0.26       | 0.00            | 33.89              | 31.26              |
| XLOC_006896 | RTN1                    | 1.30       | 0.47       | 0.00            | 33.60              | 32.12              |
| XLOC_013888 | ZMYND8                  | 1.19       | 0.00       | 0.00            | 33.46              | 22.95              |
| XLOC_004365 | NRXN2                   | 1.06       | 0.08       | 0.00            | 33.30              | 29.52              |
| XLOC_015157 | SYN2                    | 0.67       | 0.04       | 0.00            | 32.64              | 28.62              |
| XLOC_020888 | MUC17                   | 0.49       | 0.13       | 0.00            | 32.19              | 30.32              |
| XLOC_023888 | GRIA3                   | 0.44       | 0.09       | 0.00            | 32.05              | 29.74              |
| XLOC_019188 | SNAP91                  | 0.36       | 0.07       | 0.00            | 31.74              | 29.31              |
| XLOC_016742 | GRIA2                   | 0.30       | 0.10       | 0.00            | 31.50              | 29.85              |
| XLOC_023806 | DRP2                    | 0.29       | 0.16       | 0.00            | 31.45              | 30.55              |
| XLOC_002402 | CELF2                   | 0.21       | 0.08       | 0.00            | 30.98              | 29.52              |
| XLOC_005023 | SLC26A10                | 0.24       | 0.88       | 0.00            | 9.19               | 11.09              |
| XLOC_015685 | SNORD2                  | 58,199.40  | 7,672.28   | 428.26          | 7.09               | 4.16               |
| XLOC_000351 | SNORD46                 | 7,743.97   | 675.07     | 65.75           | 6.88               | 3.36               |
| XLOC_007286 | GABPB1                  | 0.23       | 0.89       | 0.00            | 6.26               | 8.22               |
| XLOC_018085 | CAMK2A                  | 3.66       | 0.45       | 0.05            | 6.16               | 3.15               |
| XLOC_002252 | AKT3                    | 0.64       | 0.05       | 0.01            | 5.61               | 2.00               |
| XLOC_009996 | HEATR6,MIR4737          | 438.05     | 63.96      | 9.16            | 5.58               | 2.80               |
| XLOC_015754 | ATP2B2                  | 0.50       | 0.22       | 0.02            | 4.76               | 3.55               |
| XLOC_005019 | KIF5A                   | 1.55       | 0.44       | 0.06            | 4.65               | 2.84               |
| XLOC_018938 | OR11A1                  | 1.16       | 0.25       | 0.05            | 4.60               | 2.39               |
| XLOC_017928 | MEF2C                   | 0.37       | 0.06       | 0.02            | 4.38               | 1.77               |
| XLOC_003028 | SPOCK2                  | 1.50       | 0.36       | 0.08            | 4.22               | 2.18               |
| XLOC_015569 | TRPC1                   | 0.30       | 0.19       | 0.02            | 4.21               | 3.50               |
| XLOC_015306 | BSN                     | 1.54       | 0.23       | 0.09            | 4.17               | 1.41               |
| XLOC_000801 | ATP1A2                  | 0.75       | 0.20       | 0.04            | 4.17               | 2.27               |
| XLOC_016663 | ANK2                    | 0.65       | 0.13       | 0.04            | 4.14               | 1.82               |
| XLOC_015917 | C3orf18                 | 18.43      | 4.88       | 1.05            | 4.13               | 2.21               |
| XLOC_022171 | NEFL                    | 2.36       | 0.75       | 0.14            | 4.09               | 2.44               |
| XLOC_010494 | SNORD58A                | 3,754.86   | 1,411.25   | 224.03          | 4.07               | 2.66               |
| XLOC_009498 | C17orf91,MIR22          | 27,254.50  | 9,823.70   | 1,676.98        | 4.02               | 2.55               |
| XLOC_013304 | ZEB2                    | 0.18       | 0.04       | 0.01            | 4.01               | 1.78               |
| XLOC_010622 | C19orf29OS              | 10.40      | 7.22       | 0.65            | 4.00               | 3.48               |
| XLOC_017616 | LOC728264,MIR143,MIR145 | 29,206.90  | 8,385.57   | 1,851.55        | 3.98               | 2.18               |
| XLOC_007754 | CYP1A1                  | 3.18       | 1.52       | 0.21            | 3.92               | 2.85               |
| XLOC_011993 | SHANK1                  | 2.43       | 0.66       | 0.17            | 3.84               | 1.96               |
| XLOC_000938 | CFH                     | 1.67       | 0.49       | 0.12            | 3.78               | 2.01               |
| XLOC_012757 | UNC80                   | 0.14       | 0.03       | 0.01            | 3.77               | 1.32               |
| XLOC_015954 | ERC2                    | 0.27       | 0.10       | 0.02            | 3.75               | 2.33               |
| XLOC_007353 | PAQR5                   | 8.27       | 2.63       | 0.77            | 3.42               | 1.77               |
| XLOC_022774 | FSD1L                   | 0.99       | 0.33       | 0.11            | 3.23               | 1.66               |
| XLOC_015891 | C3orf62                 | 13.99      | 4.34       | 1.50            | 3.22               | 1.53               |
| XLOC_014848 | SHANK3                  | 2.39       | 1.96       | 0.26            | 3.21               | 2.92               |
| XLOC_013302 | LRP1B                   | 0.06       | 0.06       | 0.01            | 3.15               | 3.17               |
| XLOC_021088 | CHPF2,MIR671            | 237.10     | 368.29     | 28.80           | 3.04               | 3.68               |
| XLOC_004029 | IFITM10                 | 0.68       | 0.77       | 0.09            | 2.99               | 3.15               |
| XLOC_011600 | LOC284454,MIR24-2       | 4,532.81   | 1,302.61   | 609.20          | 2.90               | 1.10               |
| XLOC_010467 | CELF4                   | 0.60       | 0.24       | 0.08            | 2.88               | 1.56               |
| XLOC_017019 | MAPK10                  | 0.40       | 0.25       | 0.06            | 2.79               | 2.09               |
| XLOC_005433 | TMTC1                   | 0.40       | 0.35       | 0.06            | 2.78               | 2.59               |
| XLOC_001219 | CHD5                    | 0.45       | 0.24       | 0.07            | 2.72               | 1.82               |

|             |              |        |        |       |      |      |
|-------------|--------------|--------|--------|-------|------|------|
| XLOC_023244 | GABBR2       | 0.62   | 0.15   | 0.09  | 2.70 | 0.69 |
| XLOC_004902 | PRPH         | 3.31   | 4.00   | 0.51  | 2.69 | 2.97 |
| XLOC_016864 | NKX3-2       | 1.77   | 0.94   | 0.29  | 2.62 | 1.71 |
| XLOC_009596 | NCRNA00324   | 15.15  | 6.49   | 2.49  | 2.61 | 1.38 |
| XLOC_003022 | C10orf27     | 2.70   | 2.73   | 0.46  | 2.56 | 2.57 |
| XLOC_012603 | KIF5C        | 0.75   | 0.49   | 0.15  | 2.31 | 1.69 |
| XLOC_017644 | CYFIP2       | 3.51   | 1.47   | 0.72  | 2.29 | 1.04 |
| XLOC_010448 | CDH2         | 0.42   | 0.29   | 0.09  | 2.29 | 1.74 |
| XLOC_014244 | HRH3         | 3.46   | 2.07   | 0.72  | 2.26 | 1.51 |
| XLOC_007787 | ADAMTS7      | 1.36   | 0.66   | 0.29  | 2.25 | 1.22 |
| XLOC_012653 | RAPGEF4      | 0.48   | 0.22   | 0.10  | 2.22 | 1.12 |
| XLOC_010953 | ZNF568       | 0.61   | 0.41   | 0.13  | 2.21 | 1.63 |
| XLOC_013041 | NRXN1        | 0.17   | 0.09   | 0.04  | 2.16 | 1.26 |
| XLOC_008980 | SHISA6       | 0.82   | 0.39   | 0.18  | 2.16 | 1.09 |
| XLOC_017317 | PTGER4       | 0.21   | 0.51   | 0.05  | 2.14 | 3.43 |
| XLOC_000239 | LOC100129196 | 6.41   | 2.60   | 1.46  | 2.13 | 0.83 |
| XLOC_006983 | PTPN21       | 1.99   | 1.15   | 0.47  | 2.09 | 1.31 |
| XLOC_001495 | ZSWIM5       | 1.15   | 0.72   | 0.27  | 2.08 | 1.41 |
| XLOC_010259 | GNAL         | 3.75   | 2.80   | 0.90  | 2.06 | 1.64 |
| XLOC_015322 | DOCK3        | 0.24   | 0.13   | 0.06  | 2.06 | 1.15 |
| XLOC_021157 | VWDE         | 0.41   | 0.34   | 0.10  | 2.06 | 1.80 |
| XLOC_013792 | BPIFB1       | 141.40 | 79.52  | 34.59 | 2.03 | 1.20 |
| XLOC_005116 | APAF1        | 15.66  | 6.33   | 3.95  | 1.99 | 0.68 |
| XLOC_023626 | MAOA         | 0.22   | 0.26   | 0.06  | 1.98 | 2.21 |
| XLOC_017385 | MAP1B        | 0.60   | 0.23   | 0.15  | 1.96 | 0.59 |
| XLOC_018169 | DOK3         | 3.26   | 1.52   | 0.84  | 1.96 | 0.86 |
| XLOC_021330 | GTF2IRD2     | 0.37   | 0.54   | 0.10  | 1.91 | 2.45 |
| XLOC_022988 | RFX3         | 0.64   | 0.58   | 0.17  | 1.90 | 1.76 |
| XLOC_013230 | LOC151009    | 1.10   | 0.90   | 0.30  | 1.88 | 1.59 |
| XLOC_012960 | KIF3C        | 0.84   | 0.59   | 0.23  | 1.88 | 1.36 |
| XLOC_011730 | U2AF1L4      | 5.29   | 5.68   | 1.45  | 1.87 | 1.97 |
| XLOC_017101 | QRFPF        | 1.22   | 0.70   | 0.34  | 1.83 | 1.02 |
| XLOC_002782 | HTRA1        | 1.43   | 1.12   | 0.41  | 1.82 | 1.47 |
| XLOC_021024 | MTRNR2L6     | 2.11   | 1.93   | 0.61  | 1.80 | 1.67 |
| XLOC_023041 | ELAVL2       | 0.39   | 0.16   | 0.11  | 1.80 | 0.48 |
| XLOC_012931 | FAM49A       | 0.38   | 0.28   | 0.11  | 1.77 | 1.33 |
| XLOC_013425 | SATB2        | 1.04   | 0.61   | 0.31  | 1.76 | 0.98 |
| XLOC_002618 | FAM22D       | 0.67   | 0.44   | 0.20  | 1.74 | 1.15 |
| XLOC_017999 | FSTL4        | 0.45   | 0.39   | 0.13  | 1.74 | 1.57 |
| XLOC_008594 | LOC613037    | 2.40   | 2.04   | 0.72  | 1.74 | 1.51 |
| XLOC_002655 | PLCE1        | 1.31   | 0.74   | 0.40  | 1.72 | 0.90 |
| XLOC_021105 | RNF32        | 1.20   | 1.25   | 0.36  | 1.72 | 1.78 |
| XLOC_002385 | AKR1C3       | 3.03   | 2.14   | 0.92  | 1.72 | 1.21 |
| XLOC_017583 | PCDHB14      | 0.50   | 0.86   | 0.15  | 1.70 | 2.49 |
| XLOC_021278 | DDC          | 0.76   | 1.72   | 0.23  | 1.70 | 2.88 |
| XLOC_012756 | MAP2         | 0.62   | 0.44   | 0.20  | 1.66 | 1.16 |
| XLOC_016730 | TRIM2        | 0.16   | 0.10   | 0.05  | 1.65 | 0.95 |
| XLOC_016413 | SORCS2       | 0.56   | 0.40   | 0.18  | 1.64 | 1.15 |
| XLOC_000986 | TMCC2        | 2.10   | 1.47   | 0.68  | 1.63 | 1.11 |
| XLOC_007416 | KIAA1024     | 0.72   | 0.71   | 0.23  | 1.62 | 1.60 |
| XLOC_022591 | FLJ35282     | 1.25   | 0.78   | 0.41  | 1.60 | 0.92 |
| XLOC_004669 | CDON         | 0.26   | 0.34   | 0.09  | 1.59 | 2.02 |
| XLOC_009202 | AOC2         | 2.33   | 2.18   | 0.78  | 1.59 | 1.49 |
| XLOC_015453 | GTPBP8       | 2.60   | 1.83   | 0.87  | 1.58 | 1.07 |
| XLOC_014206 | FAM65C       | 1.15   | 0.76   | 0.39  | 1.56 | 0.97 |
| XLOC_011382 | LOC100131691 | 1.33   | 0.89   | 0.46  | 1.54 | 0.97 |
| XLOC_014727 | HMOX1        | 106.11 | 112.90 | 37.24 | 1.51 | 1.60 |
| XLOC_014002 | SIRPB1       | 0.57   | 0.96   | 0.20  | 1.50 | 2.26 |
| XLOC_014541 | CBS          | 3.28   | 2.91   | 1.18  | 1.47 | 1.30 |
| XLOC_024178 | LOC550643    | 57.67  | 62.98  | 20.91 | 1.46 | 1.59 |
| XLOC_008052 | ABCC6P1      | 0.73   | 0.67   | 0.26  | 1.46 | 1.34 |
| XLOC_023134 | PGM5P2       | 0.98   | 1.31   | 0.36  | 1.46 | 1.87 |
| XLOC_023966 | MAGEA4       | 0.87   | 0.48   | 0.32  | 1.45 | 0.61 |

|             |                  |        |        |       |      |      |
|-------------|------------------|--------|--------|-------|------|------|
| XLOC_013829 | VSTM2L           | 5.60   | 2.91   | 2.05  | 1.45 | 0.51 |
| XLOC_011679 | TSSK6            | 3.24   | 2.53   | 1.19  | 1.44 | 1.09 |
| XLOC_012726 | FZD7             | 1.74   | 1.70   | 0.65  | 1.43 | 1.40 |
| XLOC_006917 | FUT8             | 1.41   | 0.91   | 0.53  | 1.42 | 0.78 |
| XLOC_007731 | LARP6            | 4.01   | 2.79   | 1.51  | 1.41 | 0.88 |
| XLOC_005522 | KRT81            | 26.66  | 21.80  | 10.06 | 1.41 | 1.12 |
| XLOC_003563 | RTN4RL2          | 17.48  | 17.70  | 6.61  | 1.40 | 1.42 |
| XLOC_012375 | ATP6V1B1         | 41.64  | 27.26  | 15.78 | 1.40 | 0.79 |
| XLOC_014888 | SCARF2           | 6.55   | 4.24   | 2.49  | 1.40 | 0.77 |
| XLOC_013092 | ASPRV1,LOC400960 | 1.97   | 2.05   | 0.75  | 1.39 | 1.45 |
| XLOC_011403 | C19orf23         | 2.82   | 2.83   | 1.07  | 1.39 | 1.40 |
| XLOC_016199 | LOC730091        | 0.76   | 0.71   | 0.29  | 1.38 | 1.27 |
| XLOC_023750 | NLGN3            | 0.62   | 0.71   | 0.24  | 1.36 | 1.56 |
| XLOC_008659 | CES1             | 195.58 | 173.81 | 76.29 | 1.36 | 1.19 |
| XLOC_000888 | TNN              | 0.42   | 0.52   | 0.16  | 1.36 | 1.68 |
| XLOC_014297 | RBM11            | 0.44   | 0.58   | 0.17  | 1.35 | 1.76 |
| XLOC_018667 | TRAF3IP2-AS1     | 0.55   | 0.67   | 0.22  | 1.34 | 1.63 |
| XLOC_016927 | SGCB             | 0.57   | 0.61   | 0.23  | 1.33 | 1.44 |
| XLOC_013669 | SNPH             | 42.42  | 31.04  | 16.93 | 1.33 | 0.87 |
| XLOC_002125 | SLC45A3          | 1.12   | 0.67   | 0.45  | 1.32 | 0.58 |
| XLOC_021034 | TMEM139          | 7.78   | 7.10   | 3.12  | 1.32 | 1.19 |
| XLOC_003040 | ZMYND17          | 0.78   | 0.70   | 0.32  | 1.30 | 1.14 |
| XLOC_020802 | CCDC146          | 0.44   | 0.47   | 0.18  | 1.30 | 1.39 |
| XLOC_021425 | GATS             | 3.80   | 2.15   | 1.55  | 1.30 | 0.47 |
| XLOC_011988 | FAM71E1          | 9.17   | 5.44   | 3.73  | 1.30 | 0.54 |
| XLOC_021538 | PODXL            | 6.35   | 4.62   | 2.59  | 1.30 | 0.84 |
| XLOC_002037 | LOC100527964     | 1.59   | 1.16   | 0.65  | 1.29 | 0.84 |
| XLOC_019301 | SLC2A12          | 0.26   | 0.16   | 0.11  | 1.29 | 0.61 |
| XLOC_018329 | BTN2A2           | 1.72   | 1.38   | 0.71  | 1.28 | 0.97 |
| XLOC_001109 | RYR2             | 0.21   | 0.15   | 0.09  | 1.28 | 0.76 |
| XLOC_014657 | DDTL             | 1.63   | 1.69   | 0.67  | 1.28 | 1.33 |
| XLOC_018758 | RAB32            | 7.22   | 6.46   | 2.99  | 1.27 | 1.11 |
| XLOC_024463 | PDZD4            | 2.70   | 1.61   | 1.13  | 1.26 | 0.52 |
| XLOC_015999 | FAM86DP          | 3.33   | 2.32   | 1.39  | 1.26 | 0.74 |
| XLOC_001349 | LOC646471        | 1.86   | 2.86   | 0.78  | 1.25 | 1.87 |
| XLOC_011821 | ATP1A3           | 5.78   | 4.14   | 2.44  | 1.25 | 0.76 |
| XLOC_005391 | GRIN2B           | 0.65   | 0.39   | 0.27  | 1.24 | 0.51 |
| XLOC_009551 | LOC728392        | 4.70   | 3.27   | 1.99  | 1.24 | 0.72 |
| XLOC_002142 | PLXNA2           | 0.73   | 0.50   | 0.31  | 1.23 | 0.68 |
| XLOC_011685 | LOC284440        | 0.14   | 0.65   | 0.06  | 1.23 | 3.40 |
| XLOC_009097 | RHBDL3           | 5.75   | 4.72   | 2.46  | 1.23 | 0.94 |
| XLOC_005964 | FREM2            | 0.29   | 0.28   | 0.12  | 1.22 | 1.16 |
| XLOC_020621 | GPNMB            | 8.79   | 7.22   | 3.77  | 1.22 | 0.94 |
| XLOC_014044 | JAG1             | 0.17   | 0.27   | 0.07  | 1.20 | 1.87 |
| XLOC_014915 | DERL3            | 9.34   | 7.57   | 4.06  | 1.20 | 0.90 |
| XLOC_018127 | ATP10B           | 0.54   | 0.35   | 0.23  | 1.20 | 0.57 |
| XLOC_017027 | ABCG2            | 0.75   | 0.96   | 0.33  | 1.20 | 1.55 |
| XLOC_010938 | APLP1            | 42.26  | 33.22  | 18.57 | 1.19 | 0.84 |
| XLOC_021444 | CLDN15           | 6.20   | 5.40   | 2.74  | 1.18 | 0.98 |
| XLOC_011761 | ZNF573           | 0.50   | 0.60   | 0.22  | 1.17 | 1.45 |
| XLOC_006208 | THSD1P1          | 0.57   | 0.79   | 0.25  | 1.17 | 1.64 |
| XLOC_009636 | C17orf76         | 1.52   | 1.82   | 0.68  | 1.16 | 1.42 |
| XLOC_017782 | ANKH             | 0.19   | 0.15   | 0.08  | 1.16 | 0.89 |
| XLOC_022391 | SYBU             | 0.62   | 0.72   | 0.28  | 1.16 | 1.37 |
| XLOC_020562 | GPR146           | 1.94   | 1.91   | 0.88  | 1.15 | 1.12 |
| XLOC_010734 | ZNF441           | 0.80   | 0.66   | 0.36  | 1.15 | 0.88 |
| XLOC_001164 | LOC729737        | 1.22   | 2.10   | 0.55  | 1.15 | 1.93 |
| XLOC_021603 | LOC401431        | 2.90   | 1.86   | 1.31  | 1.15 | 0.51 |
| XLOC_000923 | SWT1             | 1.23   | 1.38   | 0.56  | 1.14 | 1.31 |
| XLOC_007778 | LINGO1           | 4.93   | 4.75   | 2.23  | 1.14 | 1.09 |
| XLOC_016256 | ABCC5            | 3.83   | 4.47   | 1.74  | 1.14 | 1.36 |
| XLOC_006353 | DHRS2            | 6.10   | 6.00   | 2.77  | 1.14 | 1.12 |
| XLOC_003436 | NAV2             | 0.46   | 0.43   | 0.21  | 1.14 | 1.03 |

|             |                      |        |        |       |      |      |
|-------------|----------------------|--------|--------|-------|------|------|
| XLOC_016994 | ANKRD56              | 2.51   | 2.15   | 1.14  | 1.14 | 0.92 |
| XLOC_007295 | TMOD2                | 0.57   | 0.53   | 0.26  | 1.13 | 1.02 |
| XLOC_022919 | ADAMTS13             | 3.33   | 2.12   | 1.52  | 1.13 | 0.48 |
| XLOC_021431 | SAP25                | 1.59   | 6.18   | 0.73  | 1.13 | 3.09 |
| XLOC_014339 | OLIG1                | 2.29   | 2.51   | 1.05  | 1.12 | 1.26 |
| XLOC_019355 | SYNE1                | 0.09   | 0.09   | 0.04  | 1.12 | 1.19 |
| XLOC_015967 | ACOX2                | 2.13   | 1.52   | 0.98  | 1.12 | 0.64 |
| XLOC_008480 | C16orf5              | 15.89  | 14.06  | 7.31  | 1.12 | 0.94 |
| XLOC_002924 | NRP1                 | 2.12   | 2.31   | 0.98  | 1.11 | 1.24 |
| XLOC_000904 | FLJ23867,QSOX1       | 17.95  | 14.68  | 8.31  | 1.11 | 0.82 |
| XLOC_015336 | GLYCTK               | 3.42   | 3.93   | 1.59  | 1.11 | 1.31 |
| XLOC_012182 | LOC150622            | 0.19   | 0.12   | 0.09  | 1.11 | 0.50 |
| XLOC_011334 | ZNF583               | 0.99   | 0.83   | 0.46  | 1.10 | 0.85 |
| XLOC_002877 | RSU1                 | 2.37   | 2.44   | 1.10  | 1.10 | 1.14 |
| XLOC_021519 | PRRT4                | 6.31   | 5.00   | 2.95  | 1.10 | 0.76 |
| XLOC_003669 | PPP2R5B              | 5.33   | 4.79   | 2.50  | 1.09 | 0.94 |
| XLOC_019061 | MDGA1                | 0.46   | 0.55   | 0.22  | 1.08 | 1.35 |
| XLOC_021791 | DPYSL2               | 0.54   | 0.47   | 0.26  | 1.07 | 0.86 |
| XLOC_009949 | DLX3                 | 1.08   | 1.44   | 0.52  | 1.07 | 1.47 |
| XLOC_002616 | FAM22A               | 3.61   | 2.76   | 1.73  | 1.06 | 0.68 |
| XLOC_008521 | ABCC6                | 11.23  | 10.96  | 5.39  | 1.06 | 1.02 |
| XLOC_002756 | ATRNL1               | 0.38   | 0.27   | 0.18  | 1.06 | 0.56 |
| XLOC_020700 | ADCY1                | 1.51   | 1.10   | 0.73  | 1.05 | 0.59 |
| XLOC_011391 | SHC2                 | 8.96   | 8.37   | 4.36  | 1.04 | 0.94 |
| XLOC_012235 | DPYSL5               | 2.09   | 1.70   | 1.02  | 1.04 | 0.74 |
| XLOC_013585 | KIF1A                | 13.36  | 12.92  | 6.52  | 1.04 | 0.99 |
| XLOC_000323 | C1orf50              | 8.24   | 7.95   | 4.04  | 1.03 | 0.98 |
| XLOC_018292 | ID4                  | 3.42   | 2.49   | 1.69  | 1.02 | 0.56 |
| XLOC_007653 | MYO5A                | 1.62   | 1.47   | 0.81  | 1.01 | 0.86 |
| XLOC_021727 | MSRA                 | 4.13   | 3.53   | 2.06  | 1.00 | 0.78 |
| XLOC_018267 | GCNT2                | 2.24   | 1.80   | 1.12  | 1.00 | 0.68 |
| XLOC_019182 | ELOVL4               | 0.20   | 0.26   | 0.10  | 1.00 | 1.34 |
| XLOC_020610 | HDAC9                | 1.61   | 1.25   | 0.81  | 0.99 | 0.63 |
| XLOC_014926 | POM121L10P           | 0.24   | 0.47   | 0.12  | 0.99 | 1.92 |
| XLOC_000620 | FAM72B               | 0.55   | 0.44   | 0.28  | 0.99 | 0.66 |
| XLOC_015513 | CCDC48               | 2.28   | 3.58   | 1.15  | 0.98 | 1.64 |
| XLOC_022404 | SNTB1                | 1.05   | 0.82   | 0.53  | 0.98 | 0.61 |
| XLOC_004884 | TMEM117              | 0.39   | 0.42   | 0.20  | 0.98 | 1.10 |
| XLOC_008607 | C16orf93             | 11.65  | 8.37   | 5.90  | 0.98 | 0.50 |
| XLOC_023224 | C9orf130             | 2.99   | 3.18   | 1.52  | 0.97 | 1.06 |
| XLOC_006912 | GPX2                 | 135.35 | 147.68 | 69.00 | 0.97 | 1.10 |
| XLOC_009904 | LRRC37A4             | 2.80   | 2.14   | 1.43  | 0.97 | 0.58 |
| XLOC_003619 | DAGLA                | 1.54   | 1.58   | 0.79  | 0.97 | 1.01 |
| XLOC_022021 | KHDRBS3              | 0.85   | 1.35   | 0.44  | 0.97 | 1.63 |
| XLOC_021748 | ZDHHC2               | 1.22   | 1.01   | 0.63  | 0.97 | 0.69 |
| XLOC_004476 | KLHL35               | 9.32   | 7.74   | 4.78  | 0.96 | 0.69 |
| XLOC_008814 | C16orf7              | 18.04  | 18.68  | 9.26  | 0.96 | 1.01 |
| XLOC_017280 | LOC100505738,MIR4458 | 0.90   | 81.45  | 0.46  | 0.96 | 7.47 |
| XLOC_015959 | IL17RD               | 0.54   | 0.42   | 0.28  | 0.96 | 0.58 |
| XLOC_005545 | LOC283335            | 1.17   | 1.25   | 0.60  | 0.96 | 1.06 |
| XLOC_001770 | HIST2H2BC            | 14.65  | 12.37  | 7.56  | 0.96 | 0.71 |
| XLOC_003219 | CHST15               | 9.45   | 8.58   | 4.89  | 0.95 | 0.81 |
| XLOC_009389 | OTOP3                | 4.45   | 3.97   | 2.30  | 0.95 | 0.78 |
| XLOC_015592 | AADAC                | 0.63   | 0.74   | 0.33  | 0.95 | 1.18 |
| XLOC_005424 | BHLHE41              | 7.37   | 7.13   | 3.83  | 0.94 | 0.90 |
| XLOC_019393 | RPS6KA2              | 1.00   | 1.47   | 0.52  | 0.94 | 1.49 |
| XLOC_023390 | FAM78A               | 2.69   | 1.99   | 1.41  | 0.94 | 0.50 |
| XLOC_022929 | OLFM1                | 12.63  | 10.95  | 6.62  | 0.93 | 0.73 |
| XLOC_022449 | TSNARE1              | 5.09   | 3.98   | 2.67  | 0.93 | 0.58 |
| XLOC_015380 | GPR27                | 3.71   | 3.05   | 1.95  | 0.93 | 0.65 |
| XLOC_018038 | MZB1                 | 6.24   | 5.78   | 3.28  | 0.93 | 0.82 |
| XLOC_023768 | TSIX                 | 0.04   | 0.04   | 0.02  | 0.93 | 0.96 |
| XLOC_022353 | C8orf37              | 0.73   | 0.56   | 0.39  | 0.93 | 0.53 |

|             |              |          |          |        |      |      |
|-------------|--------------|----------|----------|--------|------|------|
| XLOC_007485 | SLCO3A1      | 3.88     | 4.65     | 2.04   | 0.93 | 1.19 |
| XLOC_015663 | VWA5B2       | 1.19     | 1.35     | 0.63   | 0.92 | 1.11 |
| XLOC_023448 | LOC100131193 | 11.18    | 10.03    | 5.90   | 0.92 | 0.77 |
| XLOC_002948 | ANUBL1       | 0.53     | 0.39     | 0.28   | 0.92 | 0.48 |
| XLOC_022213 | STAR         | 0.32     | 0.65     | 0.17   | 0.92 | 1.95 |
| XLOC_015495 | LOC100125556 | 2.05     | 2.36     | 1.09   | 0.92 | 1.12 |
| XLOC_023152 | TMEM2        | 1.39     | 1.24     | 0.74   | 0.91 | 0.75 |
| XLOC_000325 | ERMAP        | 1.51     | 2.00     | 0.81   | 0.91 | 1.31 |
| XLOC_017329 | PARP8        | 0.59     | 0.49     | 0.32   | 0.91 | 0.63 |
| XLOC_016258 | CAMK2N2      | 30.75    | 22.82    | 16.42  | 0.91 | 0.47 |
| XLOC_006421 | PTGER2       | 4.04     | 4.48     | 2.16   | 0.90 | 1.05 |
| XLOC_012362 | APLF         | 0.31     | 0.28     | 0.17   | 0.90 | 0.74 |
| XLOC_013363 | GPR155       | 0.95     | 0.84     | 0.51   | 0.90 | 0.72 |
| XLOC_021794 | SCARA3       | 19.05    | 14.53    | 10.20  | 0.90 | 0.51 |
| XLOC_018988 | HSPA1L       | 1.54     | 1.33     | 0.83   | 0.90 | 0.69 |
| XLOC_011347 | ZNF460       | 0.73     | 0.70     | 0.39   | 0.90 | 0.84 |
| XLOC_007732 | THAP10       | 3.14     | 2.33     | 1.68   | 0.90 | 0.47 |
| XLOC_009114 | SLFN5        | 1.26     | 0.94     | 0.68   | 0.89 | 0.46 |
| XLOC_014772 | FAM83F       | 2.64     | 2.36     | 1.42   | 0.89 | 0.73 |
| XLOC_012371 | MXD1         | 1.94     | 2.24     | 1.05   | 0.89 | 1.10 |
| XLOC_000753 | LOC645676    | 2.77     | 2.27     | 1.51   | 0.88 | 0.59 |
| XLOC_018835 | LOC401233    | 0.25     | 0.30     | 0.14   | 0.87 | 1.14 |
| XLOC_007340 | SMAD6        | 15.37    | 11.83    | 8.40   | 0.87 | 0.49 |
| XLOC_014987 | APOL4        | 0.71     | 0.73     | 0.39   | 0.87 | 0.91 |
| XLOC_020879 | MOSPD3       | 29.42    | 32.88    | 16.08  | 0.87 | 1.03 |
| XLOC_007040 | ANKRD9       | 23.46    | 20.75    | 12.83  | 0.87 | 0.69 |
| XLOC_003475 | FJX1         | 47.36    | 43.65    | 25.91  | 0.87 | 0.75 |
| XLOC_020814 | RUNDC3B      | 0.22     | 0.23     | 0.12   | 0.87 | 0.93 |
| XLOC_006033 | SLAIN1       | 2.58     | 3.16     | 1.42   | 0.86 | 1.16 |
| XLOC_009208 | IFI35        | 3.10     | 2.39     | 1.71   | 0.86 | 0.49 |
| XLOC_009299 | HLF          | 1.39     | 1.23     | 0.77   | 0.86 | 0.68 |
| XLOC_023680 | USP27X       | 2.05     | 1.92     | 1.13   | 0.86 | 0.77 |
| XLOC_018760 | STXBP5       | 0.54     | 0.47     | 0.30   | 0.85 | 0.66 |
| XLOC_017489 | SNX24        | 1.18     | 1.43     | 0.66   | 0.85 | 1.12 |
| XLOC_007858 | ADAMTS17     | 1.34     | 1.35     | 0.74   | 0.85 | 0.85 |
| XLOC_024213 | CITED1       | 25.92    | 25.10    | 14.43  | 0.85 | 0.80 |
| XLOC_023769 | JPX          | 3.28     | 2.65     | 1.83   | 0.84 | 0.54 |
| XLOC_021356 | CACNA2D1     | 1.14     | 0.88     | 0.64   | 0.84 | 0.46 |
| XLOC_021255 | CAMK2B       | 2.76     | 3.61     | 1.54   | 0.84 | 1.23 |
| XLOC_012538 | DPP10        | 1.35     | 1.39     | 0.75   | 0.84 | 0.88 |
| XLOC_014016 | SLC4A11      | 10.41    | 9.76     | 5.83   | 0.84 | 0.74 |
| XLOC_013767 | PSIMCT-1     | 3.83     | 3.06     | 2.14   | 0.83 | 0.51 |
| XLOC_007735 | GRAMD2       | 2.23     | 2.09     | 1.25   | 0.83 | 0.74 |
| XLOC_007679 | RORA         | 0.13     | 0.11     | 0.07   | 0.83 | 0.58 |
| XLOC_003857 | DYNC2H1      | 0.18     | 0.16     | 0.10   | 0.83 | 0.66 |
| XLOC_024197 | AWAT2        | 8.94     | 7.84     | 5.03   | 0.83 | 0.64 |
| XLOC_022178 | TRIM35       | 3.99     | 3.38     | 2.26   | 0.82 | 0.58 |
| XLOC_000375 | CYP4B1       | 34.90    | 33.61    | 19.75  | 0.82 | 0.77 |
| XLOC_012701 | GLS          | 6.22     | 5.69     | 3.52   | 0.82 | 0.69 |
| XLOC_010057 | MGC16275     | 1.20     | 1.53     | 0.68   | 0.81 | 1.16 |
| XLOC_018969 | HLA-B        | 73.28    | 60.48    | 41.75  | 0.81 | 0.53 |
| XLOC_021068 | ATP6V0E2     | 84.27    | 66.74    | 48.03  | 0.81 | 0.47 |
| XLOC_005359 | KLRAP1       | 0.45     | 0.56     | 0.26   | 0.81 | 1.12 |
| XLOC_013997 | C20orf46     | 3.09     | 2.67     | 1.77   | 0.81 | 0.60 |
| XLOC_002720 | CNNM2        | 4.35     | 4.79     | 2.49   | 0.80 | 0.94 |
| XLOC_015296 | TREX1        | 14.62    | 12.98    | 8.38   | 0.80 | 0.63 |
| XLOC_010168 | RAB40B       | 14.05    | 13.83    | 8.06   | 0.80 | 0.78 |
| XLOC_001379 | SNORD99      | 1,554.01 | 1,499.33 | 892.97 | 0.80 | 0.75 |
| XLOC_022180 | CLU          | 157.65   | 138.78   | 90.72  | 0.80 | 0.61 |
| XLOC_001545 | LDLRAD1      | 4.60     | 4.95     | 2.64   | 0.80 | 0.90 |
| XLOC_003622 | FADS2        | 4.42     | 3.58     | 2.55   | 0.80 | 0.49 |
| XLOC_008220 | NLRC5        | 0.74     | 0.93     | 0.43   | 0.80 | 1.12 |
| XLOC_024280 | RAB9B        | 0.59     | 0.73     | 0.34   | 0.79 | 1.09 |

|             |              |        |          |        |      |      |
|-------------|--------------|--------|----------|--------|------|------|
| XLOC_016068 | HGD          | 56.63  | 58.07    | 32.75  | 0.79 | 0.83 |
| XLOC_001976 | ILDR2        | 0.31   | 0.29     | 0.18   | 0.79 | 0.67 |
| XLOC_018869 | ATXN1        | 1.05   | 0.87     | 0.61   | 0.79 | 0.52 |
| XLOC_005173 | SH2B3        | 0.66   | 0.71     | 0.38   | 0.79 | 0.90 |
| XLOC_021250 | PGAM2        | 31.38  | 26.11    | 18.21  | 0.79 | 0.52 |
| XLOC_006402 | C14orf28     | 0.79   | 0.83     | 0.46   | 0.78 | 0.85 |
| XLOC_013066 | FAM161A      | 1.02   | 1.08     | 0.59   | 0.78 | 0.86 |
| XLOC_024224 | FTX          | 0.39   | 0.38     | 0.22   | 0.78 | 0.77 |
| XLOC_023176 | SLC28A3      | 2.84   | 2.52     | 1.66   | 0.78 | 0.60 |
| XLOC_001755 | FMO5         | 2.90   | 3.65     | 1.69   | 0.78 | 1.11 |
| XLOC_016847 | CCDC96       | 3.51   | 4.05     | 2.05   | 0.78 | 0.98 |
| XLOC_004127 | NRIP3        | 0.87   | 0.78     | 0.51   | 0.77 | 0.63 |
| XLOC_006979 | STON2        | 1.16   | 1.07     | 0.68   | 0.77 | 0.64 |
| XLOC_021387 | PON3         | 1.49   | 1.81     | 0.87   | 0.77 | 1.05 |
| XLOC_001723 | VTCN1        | 64.90  | 52.83    | 38.10  | 0.77 | 0.47 |
| XLOC_020837 | PEG10        | 21.14  | 19.72    | 12.47  | 0.76 | 0.66 |
| XLOC_024043 | MID1         | 3.28   | 2.90     | 1.94   | 0.76 | 0.58 |
| XLOC_021766 | BMP1         | 3.47   | 3.54     | 2.05   | 0.76 | 0.79 |
| XLOC_008936 | KCTD11       | 3.67   | 3.27     | 2.17   | 0.76 | 0.59 |
| XLOC_015378 | MITF         | 0.85   | 0.88     | 0.51   | 0.76 | 0.79 |
| XLOC_006873 | FERMT2       | 12.49  | 11.01    | 7.39   | 0.76 | 0.57 |
| XLOC_004717 | LOC100288778 | 5.42   | 5.37     | 3.21   | 0.75 | 0.74 |
| XLOC_008340 | OSGIN1       | 26.97  | 28.20    | 16.03  | 0.75 | 0.81 |
| XLOC_016980 | CXCL2        | 0.57   | 0.98     | 0.34   | 0.75 | 1.53 |
| XLOC_012013 | VSIG10L      | 7.37   | 6.17     | 4.39   | 0.75 | 0.49 |
| XLOC_010729 | C19orf39     | 3.59   | 3.35     | 2.14   | 0.75 | 0.65 |
| XLOC_012125 | ZSCAN18      | 6.42   | 8.10     | 3.83   | 0.75 | 1.08 |
| XLOC_010040 | WIPI1        | 27.49  | 26.14    | 16.40  | 0.75 | 0.67 |
| XLOC_024233 | TTC3P1       | 1.86   | 1.96     | 1.11   | 0.74 | 0.83 |
| XLOC_018278 | SIRT5        | 2.89   | 2.83     | 1.73   | 0.74 | 0.71 |
| XLOC_022597 | LOC100129250 | 13.44  | 15.45    | 8.04   | 0.74 | 0.94 |
| XLOC_018317 | HIST1H2AC    | 12.37  | 12.41    | 7.40   | 0.74 | 0.75 |
| XLOC_001172 | C1orf170     | 1.48   | 1.63     | 0.88   | 0.74 | 0.88 |
| XLOC_024125 | PCSK1N       | 82.41  | 81.33    | 49.45  | 0.74 | 0.72 |
| XLOC_008726 | NQO1         | 583.67 | 662.95   | 350.73 | 0.73 | 0.92 |
| XLOC_017014 | HPSE         | 0.43   | 0.41     | 0.26   | 0.73 | 0.64 |
| XLOC_023762 | PIN4         | 1.54   | 1.87     | 0.93   | 0.73 | 1.01 |
| XLOC_004197 | CSTF3        | 14.91  | 16.84    | 9.01   | 0.73 | 0.90 |
| XLOC_005061 | KCNMB4       | 1.40   | 1.41     | 0.84   | 0.73 | 0.74 |
| XLOC_015069 | EFCAB6       | 0.40   | 0.46     | 0.24   | 0.73 | 0.94 |
| XLOC_005520 | KRT80        | 11.62  | 12.40    | 7.06   | 0.72 | 0.81 |
| XLOC_012689 | GULP1        | 2.34   | 2.51     | 1.42   | 0.72 | 0.82 |
| XLOC_000144 | PQLC2        | 26.48  | 23.33    | 16.13  | 0.72 | 0.53 |
| XLOC_014784 | TEF          | 5.86   | 6.18     | 3.57   | 0.72 | 0.79 |
| XLOC_006128 | FLT3         | 3.86   | 4.07     | 2.36   | 0.71 | 0.78 |
| XLOC_001772 | HIST2H2BE    | 4.06   | 4.20     | 2.49   | 0.70 | 0.76 |
| XLOC_005541 | KRT4         | 9.31   | 11.84    | 5.72   | 0.70 | 1.05 |
| XLOC_006579 | C14orf132    | 0.61   | 1.00     | 0.37   | 0.70 | 1.42 |
| XLOC_018865 | GFOD1        | 1.27   | 1.27     | 0.78   | 0.70 | 0.70 |
| XLOC_017499 | SLC12A2      | 3.83   | 3.79     | 2.36   | 0.70 | 0.68 |
| XLOC_008892 | ITGAE        | 496.24 | 1,867.27 | 306.37 | 0.70 | 2.61 |
| XLOC_023113 | MCART1       | 3.91   | 3.33     | 2.42   | 0.69 | 0.46 |
| XLOC_005142 | C12orf75     | 1.52   | 2.33     | 0.94   | 0.69 | 1.31 |
| XLOC_012119 | ZNF814       | 0.34   | 0.30     | 0.21   | 0.69 | 0.52 |
| XLOC_011667 | CRLF1        | 5.11   | 7.19     | 3.17   | 0.69 | 1.18 |
| XLOC_010955 | ZNF383       | 2.20   | 1.97     | 1.36   | 0.69 | 0.53 |
| XLOC_018319 | HIST1H2BD    | 10.57  | 13.33    | 6.56   | 0.69 | 1.02 |
| XLOC_014957 | RNF215       | 15.62  | 15.35    | 9.69   | 0.69 | 0.66 |
| XLOC_021169 | TWIST1       | 9.30   | 8.46     | 5.78   | 0.68 | 0.55 |
| XLOC_020855 | ZNF789       | 4.53   | 4.22     | 2.82   | 0.68 | 0.58 |
| XLOC_018274 | TMEM170B     | 0.77   | 0.74     | 0.48   | 0.68 | 0.63 |
| XLOC_011230 | ZNF331       | 2.00   | 1.73     | 1.25   | 0.68 | 0.47 |
| XLOC_010114 | TIMP2        | 10.99  | 10.65    | 6.87   | 0.68 | 0.63 |

|             |                     |          |          |        |      |      |
|-------------|---------------------|----------|----------|--------|------|------|
| XLOC_021098 | LOC100132707        | 2.32     | 2.56     | 1.46   | 0.67 | 0.82 |
| XLOC_012236 | MAPRE3              | 25.34    | 22.52    | 15.93  | 0.67 | 0.50 |
| XLOC_005098 | CRADD               | 4.23     | 4.23     | 2.66   | 0.67 | 0.67 |
| XLOC_011085 | CCDC61              | 3.99     | 3.78     | 2.51   | 0.67 | 0.59 |
| XLOC_005084 | TMTC2               | 1.35     | 1.26     | 0.85   | 0.67 | 0.57 |
| XLOC_002654 | SLC35G1             | 0.81     | 0.95     | 0.51   | 0.66 | 0.89 |
| XLOC_000133 | CROCC               | 2.09     | 1.99     | 1.32   | 0.66 | 0.59 |
| XLOC_012308 | CAMKMT              | 4.24     | 4.15     | 2.68   | 0.66 | 0.63 |
| XLOC_001729 | ZNF697              | 0.70     | 0.63     | 0.44   | 0.66 | 0.50 |
| XLOC_018613 | CYB5R4              | 6.88     | 7.23     | 4.38   | 0.65 | 0.72 |
| XLOC_007227 | C15orf62            | 2.00     | 2.15     | 1.27   | 0.65 | 0.75 |
| XLOC_012433 | NCRNA00152          | 30.31    | 30.41    | 19.31  | 0.65 | 0.66 |
| XLOC_000147 | OTUD3               | 1.22     | 1.32     | 0.78   | 0.65 | 0.76 |
| XLOC_018632 | TSG1                | 0.08     | 0.18     | 0.05   | 0.65 | 1.78 |
| XLOC_002457 | BAMBI               | 240.14   | 238.28   | 153.80 | 0.64 | 0.63 |
| XLOC_023110 | FBXO10              | 0.59     | 0.76     | 0.38   | 0.64 | 0.99 |
| XLOC_010030 | LRRC37A3            | 4.71     | 4.56     | 3.02   | 0.64 | 0.59 |
| XLOC_005994 | CDADC1              | 1.51     | 1.46     | 0.97   | 0.64 | 0.59 |
| XLOC_012563 | LOC285103           | 1.39     | 2.00     | 0.89   | 0.64 | 1.17 |
| XLOC_021754 | NAT2                | 1.08     | 1.82     | 0.70   | 0.64 | 1.39 |
| XLOC_008334 | PLCG2               | 1.65     | 2.00     | 1.06   | 0.64 | 0.91 |
| XLOC_022165 | TNFRSF10A           | 9.59     | 9.46     | 6.17   | 0.64 | 0.62 |
| XLOC_020737 | ZNF273              | 0.27     | 0.39     | 0.17   | 0.64 | 1.19 |
| XLOC_011570 | ZNF433              | 1.06     | 1.04     | 0.68   | 0.64 | 0.61 |
| XLOC_007826 | NTRK3               | 1.33     | 1.54     | 0.85   | 0.63 | 0.85 |
| XLOC_014436 | C21orf91,NCRNA00285 | 0.54     | 1.03     | 0.35   | 0.63 | 1.57 |
| XLOC_011380 | ZNF446              | 12.08    | 10.99    | 7.80   | 0.63 | 0.49 |
| XLOC_001719 | ATP1A1OS            | 7.04     | 13.18    | 4.55   | 0.63 | 1.54 |
| XLOC_018276 | EDN1                | 8.03     | 9.14     | 5.20   | 0.63 | 0.81 |
| XLOC_016897 | TLR6                | 0.37     | 0.36     | 0.24   | 0.62 | 0.60 |
| XLOC_001378 | SNHG12,SNORA61      | 159.69   | 151.41   | 104.06 | 0.62 | 0.54 |
| XLOC_016047 | WDR52               | 0.33     | 0.40     | 0.21   | 0.62 | 0.90 |
| XLOC_005136 | TXNRD1              | 85.98    | 94.01    | 56.12  | 0.62 | 0.74 |
| XLOC_018287 | CAP2                | 2.53     | 2.72     | 1.65   | 0.62 | 0.72 |
| XLOC_002839 | AKR1C2              | 72.51    | 107.87   | 47.39  | 0.61 | 1.19 |
| XLOC_003914 | TTC36               | 6.26     | 7.04     | 4.10   | 0.61 | 0.78 |
| XLOC_015247 | ZBTB47              | 2.70     | 2.96     | 1.77   | 0.61 | 0.74 |
| XLOC_011536 | OLFM2               | 17.87    | 16.55    | 11.73  | 0.61 | 0.50 |
| XLOC_007092 | LOC653061           | 0.45     | 0.56     | 0.29   | 0.60 | 0.93 |
| XLOC_010307 | MAPRE2              | 5.11     | 5.01     | 3.37   | 0.60 | 0.57 |
| XLOC_012723 | CASP8               | 6.67     | 7.38     | 4.41   | 0.60 | 0.74 |
| XLOC_024480 | G6PD                | 1,094.24 | 1,041.12 | 723.93 | 0.60 | 0.52 |
| XLOC_022465 | C8orf73             | 2.67     | 3.29     | 1.76   | 0.60 | 0.90 |
| XLOC_006422 | GPR137C             | 0.45     | 0.54     | 0.30   | 0.60 | 0.87 |
| XLOC_004040 | KCNQ1OT1            | 0.02     | 0.03     | 0.01   | 0.60 | 1.06 |
| XLOC_001526 | EPS15               | 5.40     | 5.48     | 3.58   | 0.59 | 0.62 |
| XLOC_016861 | HS3ST1              | 1.09     | 1.06     | 0.72   | 0.59 | 0.56 |
| XLOC_009968 | C17orf67            | 2.85     | 4.56     | 1.89   | 0.59 | 1.27 |
| XLOC_006742 | TEP1                | 2.41     | 2.35     | 1.60   | 0.59 | 0.55 |
| XLOC_012531 | CBWD2               | 2.22     | 2.62     | 1.48   | 0.59 | 0.82 |
| XLOC_002143 | LAMB3,MIR4260       | 4.14     | 4.07     | 2.75   | 0.59 | 0.56 |
| XLOC_023333 | ZBTB26              | 1.32     | 1.28     | 0.88   | 0.58 | 0.54 |
| XLOC_003500 | MAPK8IP1            | 16.42    | 16.07    | 10.96  | 0.58 | 0.55 |
| XLOC_007865 | PCSK6               | 5.79     | 5.35     | 3.86   | 0.58 | 0.47 |
| XLOC_017349 | PART1               | 0.92     | 1.02     | 0.62   | 0.58 | 0.74 |
| XLOC_017492 | GRAMD3              | 5.63     | 5.16     | 3.76   | 0.58 | 0.46 |
| XLOC_011481 | PSPN                | 12.78    | 18.03    | 8.55   | 0.58 | 1.08 |
| XLOC_018027 | NME5                | 1.39     | 1.65     | 0.93   | 0.58 | 0.83 |
| XLOC_000864 | GORAB               | 2.38     | 2.20     | 1.60   | 0.58 | 0.46 |
| XLOC_015848 | ALS2CL              | 2.73     | 3.11     | 1.83   | 0.58 | 0.77 |
| XLOC_011316 | ZNF628              | 4.08     | 3.74     | 2.73   | 0.58 | 0.45 |
| XLOC_012518 | ZC3H6               | 0.59     | 0.59     | 0.40   | 0.58 | 0.58 |
| XLOC_018281 | CD83                | 1.82     | 2.05     | 1.22   | 0.58 | 0.75 |

|             |                             |          |          |          |      |      |
|-------------|-----------------------------|----------|----------|----------|------|------|
| XLOC_015479 | EAF2                        | 2.41     | 2.77     | 1.62     | 0.57 | 0.77 |
| XLOC_022796 | C9orf43                     | 0.85     | 1.19     | 0.57     | 0.57 | 1.07 |
| XLOC_019254 | TUBE1                       | 1.83     | 1.84     | 1.23     | 0.57 | 0.58 |
| XLOC_022785 | DNAJC25,DNAJC25-GNG10,GNG10 | 17.48    | 17.98    | 11.77    | 0.57 | 0.61 |
| XLOC_019037 | GRM4                        | 1.32     | 2.07     | 0.89     | 0.57 | 1.22 |
| XLOC_012602 | EPC2                        | 2.65     | 2.49     | 1.78     | 0.57 | 0.48 |
| XLOC_018345 | ZNF391                      | 0.47     | 1.16     | 0.32     | 0.57 | 1.88 |
| XLOC_019221 | USP45                       | 0.50     | 0.64     | 0.34     | 0.57 | 0.92 |
| XLOC_002471 | LOC399744                   | 1.51     | 2.10     | 1.02     | 0.57 | 1.04 |
| XLOC_002881 | PTPLA                       | 2.75     | 2.97     | 1.86     | 0.56 | 0.67 |
| XLOC_003771 | P2RY6                       | 4.26     | 6.92     | 2.89     | 0.56 | 1.26 |
| XLOC_007209 | SPRED1                      | 1.17     | 1.37     | 0.79     | 0.56 | 0.78 |
| XLOC_022121 | FAM167A                     | 1.75     | 2.13     | 1.19     | 0.56 | 0.84 |
| XLOC_000561 | GSTM4                       | 19.76    | 18.78    | 13.40    | 0.56 | 0.49 |
| XLOC_003009 | RUFY2                       | 3.76     | 3.96     | 2.55     | 0.56 | 0.64 |
| XLOC_013451 | FASTKD2                     | 4.80     | 5.42     | 3.27     | 0.56 | 0.73 |
| XLOC_016841 | CRMP1                       | 0.28     | 0.61     | 0.19     | 0.56 | 1.68 |
| XLOC_009632 | TRIM16                      | 25.18    | 26.34    | 17.13    | 0.56 | 0.62 |
| XLOC_021984 | MED30                       | 8.38     | 8.63     | 5.71     | 0.55 | 0.59 |
| XLOC_020929 | MDFIC                       | 2.10     | 2.07     | 1.43     | 0.55 | 0.53 |
| XLOC_010607 | ZNF554                      | 1.61     | 1.90     | 1.10     | 0.55 | 0.79 |
| XLOC_015337 | DNAH1                       | 0.51     | 0.48     | 0.35     | 0.55 | 0.46 |
| XLOC_004849 | ETNK1                       | 7.31     | 9.45     | 5.01     | 0.55 | 0.92 |
| XLOC_009666 | ULK2                        | 3.98     | 4.81     | 2.73     | 0.55 | 0.82 |
| XLOC_001730 | HMGCS2                      | 17.70    | 18.71    | 12.18    | 0.54 | 0.62 |
| XLOC_024414 | SLITRK4                     | 0.20     | 0.21     | 0.14     | 0.54 | 0.62 |
| XLOC_023914 | NCRNA00086                  | 1.04     | 0.99     | 0.72     | 0.54 | 0.47 |
| XLOC_015459 | ZDHHC23                     | 4.39     | 4.17     | 3.02     | 0.54 | 0.46 |
| XLOC_024408 | LDOC1                       | 26.94    | 26.68    | 18.60    | 0.53 | 0.52 |
| XLOC_021342 | TMEM120A                    | 28.57    | 29.09    | 19.73    | 0.53 | 0.56 |
| XLOC_008139 | ZNF771                      | 3.99     | 4.02     | 2.76     | 0.53 | 0.54 |
| XLOC_000316 | LOC100507178                | 0.13     | 0.38     | 0.09     | 0.53 | 2.05 |
| XLOC_011707 | C19orf12                    | 2.92     | 3.45     | 2.02     | 0.53 | 0.77 |
| XLOC_014895 | PI4KAP2                     | 4.70     | 5.80     | 3.26     | 0.53 | 0.83 |
| XLOC_007287 | LOC100129387                | 0.42     | 0.60     | 0.29     | 0.53 | 1.03 |
| XLOC_000142 | PAX7                        | 1.46     | 1.41     | 1.01     | 0.53 | 0.47 |
| XLOC_001286 | NBPF1                       | 3.82     | 3.94     | 2.65     | 0.53 | 0.57 |
| XLOC_023579 | YY2                         | 0.50     | 0.52     | 0.35     | 0.53 | 0.57 |
| XLOC_015741 | LOC440944                   | 0.75     | 0.97     | 0.52     | 0.52 | 0.90 |
| XLOC_020782 | GTF2IRD2B                   | 0.43     | 0.70     | 0.30     | 0.52 | 1.24 |
| XLOC_010047 | ABCA10,ABCA5                | 0.47     | 0.49     | 0.33     | 0.52 | 0.60 |
| XLOC_000665 | C1orf51                     | 3.69     | 4.70     | 2.58     | 0.51 | 0.86 |
| XLOC_011880 | EML2                        | 19.10    | 18.95    | 13.38    | 0.51 | 0.50 |
| XLOC_024214 | HDAC8                       | 10.18    | 10.48    | 7.14     | 0.51 | 0.55 |
| XLOC_011043 | ZNF155                      | 1.35     | 2.06     | 0.95     | 0.51 | 1.12 |
| XLOC_000198 | CNKSR1                      | 27.71    | 28.20    | 19.48    | 0.51 | 0.53 |
| XLOC_008168 | ZNF720                      | 1.60     | 1.61     | 1.12     | 0.51 | 0.52 |
| XLOC_003120 | MORN4                       | 1.66     | 2.04     | 1.17     | 0.51 | 0.80 |
| XLOC_012220 | LOC375190                   | 1.24     | 1.64     | 0.87     | 0.51 | 0.91 |
| XLOC_023433 | DNLZ                        | 41.00    | 44.38    | 28.89    | 0.51 | 0.62 |
| XLOC_008045 | C16orf45                    | 14.92    | 14.67    | 10.51    | 0.50 | 0.48 |
| XLOC_023967 | GABRQ                       | 3.05     | 3.02     | 2.15     | 0.50 | 0.49 |
| XLOC_004321 | FTH1                        | 4,338.00 | 4,543.88 | 3,057.22 | 0.50 | 0.57 |
| XLOC_018769 | ULBP1                       | 0.74     | 1.10     | 0.52     | 0.50 | 1.07 |
| XLOC_021270 | SEPT7P2                     | 1.40     | 1.60     | 0.99     | 0.50 | 0.70 |
| XLOC_009357 | CACNG4                      | 7.15     | 7.49     | 5.05     | 0.50 | 0.57 |
| XLOC_023053 | DDX58                       | 0.72     | 0.82     | 0.51     | 0.50 | 0.70 |
| XLOC_003793 | TSKU                        | 6.26     | 8.68     | 4.43     | 0.50 | 0.97 |
| XLOC_009898 | PLCD3                       | 43.00    | 44.32    | 30.52    | 0.49 | 0.54 |
| XLOC_012468 | INPP4A                      | 3.84     | 4.26     | 2.73     | 0.49 | 0.64 |
| XLOC_022167 | ENTPD4                      | 10.03    | 10.35    | 7.12     | 0.49 | 0.54 |
| XLOC_013736 | SLC24A3                     | 0.86     | 0.93     | 0.61     | 0.49 | 0.61 |
| XLOC_018618 | C6orf162                    | 0.60     | 0.70     | 0.43     | 0.49 | 0.71 |

|             |                       |        |       |        |        |       |
|-------------|-----------------------|--------|-------|--------|--------|-------|
| XLOC_013006 | CYP1B1                | 58.54  | 69.16 | 41.66  | 0.49   | 0.73  |
| XLOC_018359 | ZNF192                | 0.35   | 0.55  | 0.25   | 0.49   | 1.14  |
| XLOC_024445 | GABRA3                | 3.00   | 3.01  | 2.14   | 0.49   | 0.49  |
| XLOC_010652 | VMAC                  | 5.83   | 6.17  | 4.16   | 0.49   | 0.57  |
| XLOC_019292 | STX7                  | 4.12   | 4.33  | 2.94   | 0.49   | 0.56  |
| XLOC_002149 | SLC30A1               | 6.42   | 7.21  | 4.59   | 0.49   | 0.65  |
| XLOC_011914 | MEIS3                 | 25.32  | 25.22 | 18.10  | 0.48   | 0.48  |
| XLOC_001884 | PAQR6                 | 4.37   | 7.36  | 3.12   | 0.48   | 1.24  |
| XLOC_015106 | CHKB,CHKB-CPT1B,CPT1B | 18.19  | 19.43 | 13.02  | 0.48   | 0.58  |
| XLOC_019405 | WDR27                 | 1.70   | 2.08  | 1.22   | 0.48   | 0.77  |
| XLOC_019116 | CYP39A1               | 1.26   | 1.40  | 0.90   | 0.48   | 0.63  |
| XLOC_017671 | FOX11                 | 71.19  | 75.89 | 51.09  | 0.48   | 0.57  |
| XLOC_009100 | CDK5R1                | 2.23   | 2.36  | 1.60   | 0.48   | 0.56  |
| XLOC_001244 | CASZ1                 | 17.38  | 17.06 | 12.48  | 0.48   | 0.45  |
| XLOC_014239 | PPP1R3D               | 21.42  | 25.95 | 15.39  | 0.48   | 0.75  |
| XLOC_002687 | ABCC2                 | 56.62  | 60.63 | 40.72  | 0.48   | 0.57  |
| XLOC_003140 | SEC31B                | 0.35   | 0.71  | 0.25   | 0.48   | 1.50  |
| XLOC_024394 | ARHGEF6               | 0.41   | 0.46  | 0.29   | 0.47   | 0.66  |
| XLOC_015189 | NR1D2                 | 5.89   | 5.89  | 4.25   | 0.47   | 0.47  |
| XLOC_011486 | DENND1C               | 1.33   | 2.35  | 0.96   | 0.47   | 1.29  |
| XLOC_008005 | GLIS2                 | 5.46   | 5.68  | 3.94   | 0.47   | 0.53  |
| XLOC_010369 | SERPINB8              | 2.07   | 2.85  | 1.49   | 0.47   | 0.93  |
| XLOC_018039 | LOC389333             | 3.71   | 3.74  | 2.68   | 0.47   | 0.48  |
| XLOC_001237 | GPR157                | 29.13  | 29.92 | 21.07  | 0.47   | 0.51  |
| XLOC_015261 | ZNF35                 | 4.37   | 4.56  | 3.16   | 0.47   | 0.53  |
| XLOC_020732 | ZNF736                | 0.38   | 0.63  | 0.28   | 0.46   | 1.17  |
| XLOC_000168 | EPHB2                 | 0.36   | 1.00  | 0.26   | 0.46   | 1.95  |
| XLOC_015350 | CACNA1D               | 2.48   | 2.61  | 1.81   | 0.46   | 0.53  |
| XLOC_008540 | DCUN1D3               | 2.43   | 2.74  | 1.77   | 0.46   | 0.63  |
| XLOC_012881 | SNED1                 | 2.61   | 2.85  | 1.90   | 0.46   | 0.58  |
| XLOC_009290 | ABCC3                 | 22.14  | 26.97 | 16.14  | 0.46   | 0.74  |
| XLOC_020780 | PMS2P5                | 5.31   | 5.59  | 3.88   | 0.45   | 0.53  |
| XLOC_017931 | MBLAC2                | 1.09   | 1.16  | 0.80   | 0.45   | 0.54  |
| XLOC_021072 | ZNF775                | 1.76   | 2.85  | 1.29   | 0.45   | 1.15  |
| XLOC_018288 | FAM8A1                | 2.80   | 3.18  | 2.05   | 0.45   | 0.64  |
| XLOC_003434 | TMEM86A               | 30.10  | 31.39 | 22.03  | 0.45   | 0.51  |
| XLOC_014923 | C22orf45              | 0.00   | 0.52  | 2.54   | -34.56 | -2.29 |
| XLOC_018404 | MUC21                 | 0.00   | 0.07  | 0.93   | -33.11 | -3.73 |
| XLOC_005967 | MIR621,SLC25A15       | 5.17   | 5.28  | 200.52 | -5.28  | -5.25 |
| XLOC_021166 | AGR3                  | 0.33   | 1.71  | 4.22   | -3.66  | -1.30 |
| XLOC_019082 | FRS3                  | 0.26   | 0.93  | 3.25   | -3.65  | -1.81 |
| XLOC_016322 | KIAA0226,MIR922       | 8.66   | 8.45  | 99.99  | -3.53  | -3.57 |
| XLOC_010959 | ZNF793                | 0.01   | 0.06  | 0.16   | -3.50  | -1.35 |
| XLOC_010056 | C17orf54              | 0.19   | 1.24  | 1.90   | -3.34  | -0.62 |
| XLOC_016168 | CP                    | 0.13   | 0.26  | 1.30   | -3.33  | -2.33 |
| XLOC_016206 | RARRES1               | 0.40   | 1.22  | 3.70   | -3.20  | -1.60 |
| XLOC_010779 | CASP14                | 0.22   | 0.16  | 1.92   | -3.15  | -3.58 |
| XLOC_001498 | CCDC163P              | 0.22   | 0.97  | 1.87   | -3.09  | -0.95 |
| XLOC_009188 | STAT5A                | 0.10   | 0.22  | 0.87   | -3.07  | -1.96 |
| XLOC_014351 | CLIC6                 | 0.14   | 0.24  | 1.18   | -3.04  | -2.27 |
| XLOC_005752 | TRPV4                 | 0.40   | 1.32  | 2.87   | -2.83  | -1.12 |
| XLOC_017974 | LOX                   | 0.08   | 0.31  | 0.57   | -2.79  | -0.90 |
| XLOC_011779 | FBXO17                | 0.31   | 0.66  | 2.08   | -2.75  | -1.66 |
| XLOC_005513 | TFCP2                 | 0.17   | 0.24  | 0.99   | -2.51  | -2.03 |
| XLOC_004540 | PGR                   | 0.02   | 0.05  | 0.09   | -2.47  | -0.92 |
| XLOC_005560 | CBX5,MIR3198-2        | 130.85 | 14.79 | 701.19 | -2.42  | -5.57 |
| XLOC_012759 | CPS1                  | 1.42   | 5.35  | 7.61   | -2.42  | -0.51 |
| XLOC_009089 | MIR4724,RAB11FIP4     | 8.62   | 9.15  | 45.94  | -2.41  | -2.33 |
| XLOC_020975 | LOC100287482          | 0.47   | 1.20  | 2.51   | -2.41  | -1.06 |
| XLOC_002842 | CALML5                | 1.13   | 2.01  | 5.86   | -2.38  | -1.54 |
| XLOC_015637 | NLGN1                 | 0.18   | 0.56  | 0.86   | -2.26  | -0.63 |
| XLOC_021236 | TARP                  | 3.39   | 7.47  | 16.03  | -2.24  | -1.10 |

|             |                               |        |        |        |       |       |
|-------------|-------------------------------|--------|--------|--------|-------|-------|
| XLOC_022806 | PAPPA                         | 0.04   | 0.04   | 0.19   | -2.21 | -2.23 |
| XLOC_020592 | ZNF853                        | 0.44   | 0.42   | 2.03   | -2.20 | -2.27 |
| XLOC_003143 | PDZD7                         | 0.51   | 0.90   | 2.20   | -2.10 | -1.29 |
| XLOC_009468 | SLC16A3                       | 8.53   | 18.52  | 36.30  | -2.09 | -0.97 |
| XLOC_024265 | ARMCX2                        | 0.52   | 0.65   | 2.21   | -2.08 | -1.76 |
| XLOC_011925 | CARD8                         | 0.99   | 1.87   | 4.05   | -2.03 | -1.11 |
| XLOC_006728 | CRIP1                         | 202.23 | 291.44 | 825.10 | -2.03 | -1.50 |
| XLOC_013813 | SPAG4                         | 1.03   | 1.02   | 4.21   | -2.03 | -2.04 |
| XLOC_007511 | HERC2P3                       | 0.24   | 0.32   | 0.95   | -2.00 | -1.58 |
| XLOC_002256 | SMYD3                         | 0.49   | 0.91   | 1.94   | -1.97 | -1.09 |
| XLOC_010368 | HMSD                          | 1.26   | 1.22   | 4.94   | -1.97 | -2.01 |
| XLOC_002663 | C10orf131                     | 6.03   | 16.89  | 23.09  | -1.94 | -0.45 |
| XLOC_020999 | AKR1D1                        | 0.34   | 0.89   | 1.30   | -1.92 | -0.55 |
| XLOC_022575 | CNTLN                         | 0.10   | 0.22   | 0.38   | -1.91 | -0.76 |
| XLOC_001966 | RGS5                          | 0.06   | 0.15   | 0.20   | -1.88 | -0.46 |
| XLOC_006762 | SALL2                         | 0.38   | 0.65   | 1.37   | -1.86 | -1.08 |
| XLOC_015419 | TMEM45A                       | 0.51   | 0.91   | 1.83   | -1.85 | -1.02 |
| XLOC_005816 | RHOF                          | 0.56   | 1.39   | 1.96   | -1.81 | -0.50 |
| XLOC_021912 | FABP5                         | 12.44  | 18.26  | 43.50  | -1.81 | -1.25 |
| XLOC_021483 | IMMP2L                        | 0.32   | 0.57   | 1.12   | -1.79 | -0.99 |
| XLOC_017221 | SORBS2                        | 0.32   | 0.73   | 1.09   | -1.78 | -0.58 |
| XLOC_005659 | CSRP2                         | 1.21   | 1.96   | 4.12   | -1.77 | -1.07 |
| XLOC_005500 | FAM186B                       | 0.35   | 0.77   | 1.19   | -1.75 | -0.62 |
| XLOC_017219 | CCDC110                       | 0.16   | 0.27   | 0.53   | -1.74 | -0.98 |
| XLOC_003743 | GAL                           | 6.01   | 14.47  | 19.88  | -1.72 | -0.46 |
| XLOC_003991 | JAM3                          | 0.21   | 0.12   | 0.71   | -1.72 | -2.56 |
| XLOC_015611 | IQCJ,IQCJ-SCHIP1,SCHIP1       | 0.24   | 0.55   | 0.80   | -1.72 | -0.55 |
| XLOC_022642 | FAM201A                       | 1.08   | 1.92   | 3.51   | -1.70 | -0.87 |
| XLOC_004746 | CD9                           | 3.81   | 7.06   | 12.35  | -1.70 | -0.81 |
| XLOC_020810 | CD36                          | 0.20   | 0.05   | 0.64   | -1.69 | -3.57 |
| XLOC_000309 | DEM1                          | 0.74   | 1.04   | 2.35   | -1.66 | -1.18 |
| XLOC_003841 | KDM4D                         | 0.39   | 0.39   | 1.22   | -1.65 | -1.62 |
| XLOC_002993 | SLC16A9                       | 0.31   | 0.49   | 0.98   | -1.65 | -1.01 |
| XLOC_015262 | ZNF502                        | 0.12   | 0.27   | 0.39   | -1.65 | -0.54 |
| XLOC_005392 | PLBD1                         | 5.04   | 4.99   | 15.73  | -1.64 | -1.66 |
| XLOC_011695 | ZNF43                         | 0.09   | 0.18   | 0.28   | -1.61 | -0.61 |
| XLOC_008336 | CDH13                         | 0.22   | 0.29   | 0.66   | -1.61 | -1.19 |
| XLOC_007406 | CRABP1                        | 6.20   | 6.44   | 18.84  | -1.60 | -1.55 |
| XLOC_006146 | CCDC169,CCDC169-SOHLH2,SOHLH2 | 0.48   | 0.65   | 1.46   | -1.60 | -1.17 |
| XLOC_015846 | LTF                           | 7.40   | 8.50   | 22.40  | -1.60 | -1.40 |
| XLOC_006039 | GPC5                          | 0.48   | 0.59   | 1.42   | -1.58 | -1.28 |
| XLOC_009635 | CENPV                         | 1.55   | 2.79   | 4.60   | -1.57 | -0.72 |
| XLOC_003664 | CCDC88B                       | 0.60   | 0.43   | 1.73   | -1.54 | -2.01 |
| XLOC_003613 | TMEM216                       | 2.22   | 3.24   | 6.43   | -1.53 | -0.99 |
| XLOC_002450 | APBB1IP                       | 0.39   | 0.14   | 1.12   | -1.53 | -2.97 |
| XLOC_001552 | TTC22                         | 1.09   | 0.60   | 3.12   | -1.52 | -2.38 |
| XLOC_002503 | ZNF488                        | 0.86   | 1.31   | 2.45   | -1.51 | -0.91 |
| XLOC_017327 | NNT                           | 0.66   | 0.52   | 1.86   | -1.51 | -1.85 |
| XLOC_001496 | MUTYH                         | 4.63   | 7.68   | 13.09  | -1.50 | -0.77 |
| XLOC_018095 | CCDC69                        | 0.74   | 1.13   | 2.10   | -1.50 | -0.89 |
| XLOC_012593 | HNMT                          | 1.06   | 1.07   | 2.99   | -1.49 | -1.48 |
| XLOC_024350 | SMARCA1                       | 0.14   | 0.27   | 0.40   | -1.49 | -0.54 |
| XLOC_003165 | CALHM2                        | 1.63   | 1.17   | 4.51   | -1.47 | -1.95 |
| XLOC_011063 | APOE                          | 2.89   | 2.91   | 7.99   | -1.47 | -1.46 |
| XLOC_001081 | DUSP5P,RHOU                   | 0.43   | 0.54   | 1.17   | -1.45 | -1.11 |
| XLOC_010802 | NWD1                          | 0.15   | 0.22   | 0.41   | -1.43 | -0.89 |
| XLOC_005398 | MGP                           | 2.23   | 4.11   | 6.01   | -1.43 | -0.55 |
| XLOC_009270 | B4GALNT2                      | 19.76  | 31.56  | 53.11  | -1.43 | -0.75 |
| XLOC_015000 | C1QTNF6                       | 0.72   | 0.98   | 1.94   | -1.42 | -0.98 |
| XLOC_010355 | PMAIP1                        | 0.30   | 0.44   | 0.78   | -1.39 | -0.81 |
| XLOC_001421 | ZMYM6NB                       | 3.40   | 2.78   | 8.91   | -1.39 | -1.68 |
| XLOC_014612 | DGCR8,MIR1306,MIR3618         | 19.72  | 12.78  | 51.61  | -1.39 | -2.01 |
| XLOC_015969 | FAM3D                         | 4.86   | 6.31   | 12.68  | -1.38 | -1.01 |

|             |              |       |       |        |       |       |
|-------------|--------------|-------|-------|--------|-------|-------|
| XLOC_000819 | PCP4L1       | 1.30  | 2.20  | 3.37   | -1.38 | -0.62 |
| XLOC_023062 | AQP3         | 10.95 | 12.19 | 28.45  | -1.38 | -1.22 |
| XLOC_008435 | NOXO1        | 4.51  | 8.37  | 11.68  | -1.37 | -0.48 |
| XLOC_007311 | MYO1E        | 1.64  | 1.08  | 4.24   | -1.37 | -1.98 |
| XLOC_023074 | CNTFR        | 2.03  | 2.93  | 5.23   | -1.36 | -0.83 |
| XLOC_016448 | FLJ39653     | 0.48  | 0.65  | 1.21   | -1.34 | -0.90 |
| XLOC_013420 | ANKRD44      | 0.15  | 0.24  | 0.39   | -1.33 | -0.71 |
| XLOC_020615 | DNAH11       | 0.14  | 0.21  | 0.35   | -1.32 | -0.77 |
| XLOC_001274 | AGMAT        | 0.94  | 1.61  | 2.33   | -1.31 | -0.53 |
| XLOC_011861 | ZNF235       | 0.37  | 0.60  | 0.91   | -1.31 | -0.60 |
| XLOC_001355 | SLC30A2      | 0.72  | 0.52  | 1.78   | -1.31 | -1.78 |
| XLOC_010525 | SERPINB4     | 4.40  | 6.63  | 10.84  | -1.30 | -0.71 |
| XLOC_019313 | IL20RA       | 1.10  | 1.23  | 2.69   | -1.30 | -1.13 |
| XLOC_019261 | TSPYL4       | 0.53  | 0.82  | 1.30   | -1.29 | -0.66 |
| XLOC_014815 | RIBC2        | 3.06  | 4.24  | 7.48   | -1.29 | -0.82 |
| XLOC_024312 | KLHL13       | 1.15  | 1.55  | 2.79   | -1.27 | -0.85 |
| XLOC_018087 | CD74         | 46.81 | 50.76 | 112.51 | -1.27 | -1.15 |
| XLOC_004275 | SLC43A3      | 6.93  | 5.69  | 16.32  | -1.24 | -1.52 |
| XLOC_015521 | LOC100507032 | 0.23  | 0.27  | 0.55   | -1.23 | -1.02 |
| XLOC_021383 | TFPI2        | 1.75  | 1.44  | 4.09   | -1.22 | -1.51 |
| XLOC_008996 | ADORA2B      | 1.49  | 1.53  | 3.48   | -1.22 | -1.18 |
| XLOC_008214 | MT1X         | 12.65 | 16.15 | 29.46  | -1.22 | -0.87 |
| XLOC_017100 | TNIP3        | 0.80  | 1.26  | 1.86   | -1.22 | -0.57 |
| XLOC_004983 | METTL7B      | 2.85  | 4.62  | 6.61   | -1.21 | -0.52 |
| XLOC_005692 | CCDC41       | 1.22  | 1.93  | 2.82   | -1.21 | -0.55 |
| XLOC_017356 | RNF180       | 0.80  | 0.91  | 1.85   | -1.21 | -1.01 |
| XLOC_004750 | TAPBPL       | 6.51  | 6.86  | 14.96  | -1.20 | -1.12 |
| XLOC_014796 | FAM109B      | 0.92  | 0.85  | 2.11   | -1.19 | -1.32 |
| XLOC_011725 | DMKN         | 24.10 | 28.21 | 55.02  | -1.19 | -0.96 |
| XLOC_018665 | SLC16A10     | 2.88  | 3.71  | 6.57   | -1.19 | -0.82 |
| XLOC_024175 | USP51        | 0.23  | 0.29  | 0.52   | -1.18 | -0.83 |
| XLOC_006730 | TMEM121      | 20.25 | 25.12 | 45.70  | -1.17 | -0.86 |
| XLOC_016573 | PARM1        | 2.65  | 4.30  | 5.95   | -1.17 | -0.47 |
| XLOC_012201 | GREB1        | 0.42  | 0.40  | 0.95   | -1.17 | -1.23 |
| XLOC_021350 | LOC100505854 | 0.88  | 1.12  | 1.97   | -1.16 | -0.81 |
| XLOC_001827 | PGLYRP4      | 4.38  | 6.98  | 9.76   | -1.16 | -0.48 |
| XLOC_012374 | VAX2         | 3.20  | 4.10  | 7.11   | -1.15 | -0.79 |
| XLOC_006865 | PYGL         | 1.11  | 1.38  | 2.44   | -1.14 | -0.82 |
| XLOC_003295 | ATHL1        | 1.34  | 1.81  | 2.90   | -1.12 | -0.68 |
| XLOC_017963 | MCC          | 0.39  | 0.42  | 0.85   | -1.11 | -1.02 |
| XLOC_015787 | SGOL1        | 2.88  | 3.84  | 6.18   | -1.10 | -0.69 |
| XLOC_024315 | SLC25A5      | 25.71 | 32.13 | 55.21  | -1.10 | -0.78 |
| XLOC_020931 | CAV2         | 0.28  | 0.42  | 0.60   | -1.10 | -0.51 |
| XLOC_021379 | HEPACAM2     | 1.51  | 1.83  | 3.23   | -1.09 | -0.82 |
| XLOC_020863 | ZSCAN21      | 1.61  | 2.48  | 3.42   | -1.09 | -0.46 |
| XLOC_005487 | FKBP11       | 11.67 | 10.45 | 24.77  | -1.09 | -1.24 |
| XLOC_004823 | EMP1         | 0.68  | 0.97  | 1.44   | -1.08 | -0.58 |
| XLOC_023300 | DFNB31       | 4.33  | 5.69  | 9.18   | -1.08 | -0.69 |
| XLOC_017380 | SMN2         | 0.54  | 0.79  | 1.15   | -1.08 | -0.55 |
| XLOC_005400 | ARHGDI1      | 39.92 | 47.18 | 83.92  | -1.07 | -0.83 |
| XLOC_018773 | MTHFD1L      | 4.44  | 6.19  | 9.32   | -1.07 | -0.59 |
| XLOC_004137 | MRVI1        | 0.18  | 0.08  | 0.38   | -1.05 | -2.23 |
| XLOC_021368 | STEAP4       | 1.33  | 1.91  | 2.74   | -1.04 | -0.52 |
| XLOC_010855 | ZNF93        | 0.94  | 0.78  | 1.93   | -1.04 | -1.31 |
| XLOC_001435 | CSF3R        | 1.09  | 1.56  | 2.23   | -1.04 | -0.52 |
| XLOC_011912 | BBC3         | 4.00  | 4.15  | 8.17   | -1.03 | -0.98 |
| XLOC_010298 | DSG3         | 0.20  | 0.15  | 0.41   | -1.03 | -1.45 |
| XLOC_012608 | FMNL2        | 0.26  | 0.33  | 0.52   | -1.02 | -0.66 |
| XLOC_011162 | FCGRT        | 18.35 | 22.53 | 37.10  | -1.02 | -0.72 |
| XLOC_012553 | LOC254128    | 0.48  | 0.55  | 0.98   | -1.01 | -0.84 |
| XLOC_006800 | CIDEB        | 5.88  | 6.78  | 11.80  | -1.00 | -0.80 |
| XLOC_020885 | TRIP6        | 30.20 | 36.48 | 60.28  | -1.00 | -0.72 |
| XLOC_019010 | HLA-DRB1     | 9.25  | 11.62 | 18.42  | -0.99 | -0.66 |

|             |                  |       |        |        |       |       |
|-------------|------------------|-------|--------|--------|-------|-------|
| XLOC_015058 | RRP7B            | 0.79  | 1.04   | 1.56   | -0.99 | -0.59 |
| XLOC_016444 | CC2D2A           | 0.99  | 0.93   | 1.96   | -0.99 | -1.07 |
| XLOC_016237 | TNFSF10          | 8.30  | 11.29  | 16.46  | -0.99 | -0.54 |
| XLOC_019009 | HLA-DRB6         | 1.43  | 1.03   | 2.83   | -0.99 | -1.46 |
| XLOC_008135 | CORO1A,LOC606724 | 14.92 | 16.63  | 29.50  | -0.98 | -0.83 |
| XLOC_009590 | HES7             | 1.49  | 1.13   | 2.93   | -0.98 | -1.38 |
| XLOC_004726 | LRTM2            | 0.65  | 0.28   | 1.28   | -0.98 | -2.21 |
| XLOC_007505 | LRRK1            | 2.06  | 2.40   | 4.06   | -0.98 | -0.76 |
| XLOC_020671 | GPR141           | 1.33  | 1.54   | 2.62   | -0.98 | -0.77 |
| XLOC_005321 | C1R              | 0.84  | 1.11   | 1.64   | -0.97 | -0.56 |
| XLOC_002867 | CDNF             | 0.74  | 0.35   | 1.44   | -0.96 | -2.04 |
| XLOC_010274 | ANKRD30B         | 0.21  | 0.22   | 0.40   | -0.96 | -0.87 |
| XLOC_016696 | PCDH10           | 0.14  | 0.06   | 0.27   | -0.95 | -2.15 |
| XLOC_019185 | UBE2CBP          | 1.02  | 0.69   | 1.97   | -0.95 | -1.51 |
| XLOC_017972 | SEMA6A           | 0.13  | 0.13   | 0.24   | -0.94 | -0.91 |
| XLOC_015738 | OXTR             | 0.22  | 0.16   | 0.43   | -0.94 | -1.41 |
| XLOC_018201 | TRIM7            | 4.49  | 4.61   | 8.55   | -0.93 | -0.89 |
| XLOC_015097 | MAPK12           | 10.77 | 12.12  | 20.43  | -0.92 | -0.75 |
| XLOC_015002 | RAC2             | 2.85  | 3.59   | 5.39   | -0.92 | -0.59 |
| XLOC_004111 | CYB5R2           | 8.79  | 11.78  | 16.63  | -0.92 | -0.50 |
| XLOC_001280 | EPHA2            | 2.73  | 3.38   | 5.17   | -0.92 | -0.61 |
| XLOC_014808 | PARVB            | 4.56  | 4.78   | 8.61   | -0.92 | -0.85 |
| XLOC_002751 | ADRB1            | 0.57  | 0.71   | 1.08   | -0.92 | -0.61 |
| XLOC_013408 | TMEM194B         | 0.58  | 0.75   | 1.09   | -0.92 | -0.53 |
| XLOC_023869 | SLC6A14          | 1.12  | 1.38   | 2.10   | -0.91 | -0.61 |
| XLOC_009221 | C17orf53         | 3.77  | 4.11   | 7.07   | -0.91 | -0.78 |
| XLOC_019142 | GSTA4            | 4.59  | 5.13   | 8.61   | -0.91 | -0.75 |
| XLOC_000719 | S100A7A          | 0.66  | 0.60   | 1.24   | -0.91 | -1.05 |
| XLOC_006183 | LCP1             | 12.94 | 14.49  | 24.17  | -0.90 | -0.74 |
| XLOC_008058 | TMC5             | 1.07  | 0.70   | 1.97   | -0.89 | -1.49 |
| XLOC_005227 | B3GNT4           | 2.17  | 2.44   | 4.01   | -0.89 | -0.72 |
| XLOC_005007 | HSD17B6          | 1.30  | 1.25   | 2.41   | -0.89 | -0.94 |
| XLOC_021750 | SLC7A2           | 0.12  | 0.15   | 0.22   | -0.88 | -0.55 |
| XLOC_006556 | RIN3             | 5.92  | 7.22   | 10.86  | -0.88 | -0.59 |
| XLOC_012045 | ZNF160           | 1.34  | 1.76   | 2.45   | -0.87 | -0.48 |
| XLOC_013703 | LOC643406        | 1.08  | 1.42   | 1.96   | -0.86 | -0.46 |
| XLOC_017401 | IQGAP2           | 8.72  | 8.90   | 15.86  | -0.86 | -0.83 |
| XLOC_003126 | MIR1287,PYROXD2  | 2.81  | 2.75   | 5.09   | -0.86 | -0.89 |
| XLOC_011780 | FBXO27           | 13.29 | 15.21  | 24.03  | -0.86 | -0.66 |
| XLOC_007356 | LOC145837        | 0.92  | 1.07   | 1.67   | -0.85 | -0.64 |
| XLOC_017955 | EFNA5            | 1.07  | 0.98   | 1.92   | -0.85 | -0.98 |
| XLOC_008191 | IRX6             | 7.00  | 8.92   | 12.58  | -0.85 | -0.50 |
| XLOC_015065 | TTLL1            | 5.35  | 5.44   | 9.61   | -0.85 | -0.82 |
| XLOC_001805 | THEM4            | 1.74  | 2.09   | 3.12   | -0.84 | -0.58 |
| XLOC_012250 | KRTCAP3          | 92.78 | 109.71 | 165.06 | -0.83 | -0.59 |
| XLOC_004764 | DSTNP2           | 3.63  | 4.29   | 6.44   | -0.83 | -0.59 |
| XLOC_016486 | RHOH             | 0.63  | 0.27   | 1.12   | -0.82 | -2.06 |
| XLOC_010136 | TMEM105          | 0.89  | 0.37   | 1.57   | -0.81 | -2.08 |
| XLOC_008429 | HS3ST6           | 5.61  | 3.99   | 9.87   | -0.81 | -1.31 |
| XLOC_008636 | MYLK3            | 0.22  | 0.17   | 0.39   | -0.81 | -1.23 |
| XLOC_002830 | IDI2             | 2.97  | 3.68   | 5.22   | -0.81 | -0.50 |
| XLOC_011373 | ZSCAN22          | 1.37  | 1.65   | 2.39   | -0.81 | -0.54 |
| XLOC_018446 | HLA-DRA          | 18.24 | 18.54  | 31.85  | -0.80 | -0.78 |
| XLOC_001883 | MEX3A            | 1.18  | 1.48   | 2.04   | -0.79 | -0.46 |
| XLOC_001105 | EDARADD          | 0.79  | 0.89   | 1.36   | -0.79 | -0.61 |
| XLOC_004879 | LRRK2            | 3.06  | 3.23   | 5.28   | -0.79 | -0.71 |
| XLOC_022446 | SLC45A4          | 3.02  | 2.78   | 5.21   | -0.79 | -0.91 |
| XLOC_004727 | CACNA1C          | 0.29  | 0.35   | 0.50   | -0.78 | -0.52 |
| XLOC_023173 | C9orf64          | 3.57  | 3.54   | 6.12   | -0.78 | -0.79 |
| XLOC_017322 | GHR              | 0.38  | 0.40   | 0.65   | -0.78 | -0.71 |
| XLOC_022907 | C9orf9           | 5.18  | 5.54   | 8.87   | -0.78 | -0.68 |
| XLOC_015760 | LOC100129480     | 1.75  | 2.17   | 3.00   | -0.77 | -0.47 |
| XLOC_012918 | ODC1             | 6.31  | 7.75   | 10.79  | -0.77 | -0.48 |

|             |                   |        |        |        |       |       |
|-------------|-------------------|--------|--------|--------|-------|-------|
| XLOC_022040 | GSDMD             | 30.17  | 36.34  | 51.29  | -0.77 | -0.50 |
| XLOC_002055 | FAM129A           | 2.33   | 2.56   | 3.96   | -0.76 | -0.63 |
| XLOC_006054 | CLYBL             | 0.53   | 0.56   | 0.90   | -0.76 | -0.67 |
| XLOC_012205 | FAM84A            | 0.44   | 0.38   | 0.74   | -0.76 | -0.98 |
| XLOC_003724 | KDM2A             | 24.98  | 30.70  | 42.13  | -0.75 | -0.46 |
| XLOC_015913 | ZMYND10           | 3.01   | 3.35   | 5.06   | -0.75 | -0.59 |
| XLOC_008396 | RGS11             | 3.12   | 3.51   | 5.26   | -0.75 | -0.58 |
| XLOC_009369 | MAP2K6            | 0.70   | 0.50   | 1.18   | -0.75 | -1.23 |
| XLOC_005108 | ELK3              | 0.75   | 0.88   | 1.26   | -0.75 | -0.52 |
| XLOC_021132 | RADIL             | 2.64   | 2.59   | 4.43   | -0.75 | -0.77 |
| XLOC_003995 | GLB1L2            | 1.41   | 1.73   | 2.36   | -0.74 | -0.45 |
| XLOC_015953 | WNT5A             | 1.17   | 1.34   | 1.95   | -0.74 | -0.54 |
| XLOC_001894 | NES               | 0.74   | 0.65   | 1.24   | -0.74 | -0.93 |
| XLOC_022659 | LOC100132352      | 3.97   | 4.66   | 6.63   | -0.74 | -0.51 |
| XLOC_005075 | SYT1              | 0.65   | 0.42   | 1.08   | -0.73 | -1.35 |
| XLOC_007603 | TTBK2             | 0.78   | 0.85   | 1.30   | -0.73 | -0.61 |
| XLOC_012982 | LOC100302650,RBKS | 1.50   | 1.64   | 2.49   | -0.73 | -0.60 |
| XLOC_003501 | GYLTL1B           | 10.54  | 10.02  | 17.45  | -0.73 | -0.80 |
| XLOC_018598 | CD109             | 0.40   | 0.46   | 0.66   | -0.73 | -0.51 |
| XLOC_008704 | ZDHC1             | 13.75  | 16.45  | 22.73  | -0.72 | -0.47 |
| XLOC_011573 | ZNF44             | 1.49   | 1.57   | 2.45   | -0.72 | -0.64 |
| XLOC_001785 | CTSK              | 1.84   | 2.17   | 3.03   | -0.72 | -0.48 |
| XLOC_023389 | FIBCD1            | 14.43  | 15.56  | 23.72  | -0.72 | -0.61 |
| XLOC_001357 | UBXN11            | 13.30  | 12.25  | 21.83  | -0.71 | -0.83 |
| XLOC_016110 | KIAA1257          | 4.57   | 4.22   | 7.50   | -0.71 | -0.83 |
| XLOC_012970 | SLC30A3           | 1.89   | 1.40   | 3.10   | -0.71 | -1.14 |
| XLOC_011175 | ATF5,MIR4751      | 298.72 | 142.26 | 488.76 | -0.71 | -1.78 |
| XLOC_021195 | HOXA3             | 0.68   | 0.80   | 1.11   | -0.71 | -0.46 |
| XLOC_017757 | SDHAP3            | 3.36   | 2.90   | 5.47   | -0.71 | -0.92 |
| XLOC_023451 | CLIC3             | 24.48  | 27.91  | 39.89  | -0.70 | -0.52 |
| XLOC_015050 | CENPM             | 35.98  | 37.66  | 58.45  | -0.70 | -0.63 |
| XLOC_021801 | HMBOX1            | 1.12   | 1.07   | 1.82   | -0.70 | -0.77 |
| XLOC_022981 | WASH1             | 3.70   | 3.42   | 6.01   | -0.70 | -0.81 |
| XLOC_002749 | C10orf81          | 6.63   | 6.06   | 10.76  | -0.70 | -0.83 |
| XLOC_004660 | ESAM              | 3.32   | 3.71   | 5.38   | -0.70 | -0.54 |
| XLOC_003254 | SPRN              | 2.22   | 2.61   | 3.59   | -0.70 | -0.46 |
| XLOC_001272 | C1orf126          | 0.18   | 0.21   | 0.30   | -0.69 | -0.50 |
| XLOC_005353 | CLEC7A            | 3.44   | 2.10   | 5.56   | -0.69 | -1.41 |
| XLOC_011755 | LOC284412         | 0.52   | 0.43   | 0.84   | -0.69 | -0.97 |
| XLOC_015240 | ZNF620            | 1.26   | 1.26   | 2.02   | -0.69 | -0.68 |
| XLOC_021091 | LOC100505483      | 2.57   | 2.52   | 4.13   | -0.68 | -0.71 |
| XLOC_005303 | LOC678655         | 3.22   | 3.62   | 5.16   | -0.68 | -0.51 |
| XLOC_009101 | TMEM98            | 1.11   | 0.61   | 1.78   | -0.68 | -1.56 |
| XLOC_024255 | TSPAN6            | 4.02   | 4.51   | 6.44   | -0.68 | -0.51 |
| XLOC_006880 | WDHD1             | 1.65   | 1.91   | 2.63   | -0.67 | -0.46 |
| XLOC_007300 | FLJ27352          | 3.79   | 4.32   | 6.04   | -0.67 | -0.48 |
| XLOC_019360 | CNKSR3            | 1.30   | 1.41   | 2.07   | -0.67 | -0.56 |
| XLOC_009692 | RAB34             | 35.17  | 38.29  | 56.00  | -0.67 | -0.55 |
| XLOC_000416 | FGGY              | 0.88   | 0.56   | 1.41   | -0.67 | -1.32 |
| XLOC_005284 | RAD52             | 3.02   | 2.87   | 4.79   | -0.67 | -0.74 |
| XLOC_018987 | LSM2              | 25.36  | 28.69  | 40.17  | -0.66 | -0.49 |
| XLOC_024187 | FAM123B           | 0.61   | 0.55   | 0.96   | -0.66 | -0.80 |
| XLOC_017178 | DDX60L            | 0.15   | 0.16   | 0.24   | -0.66 | -0.62 |
| XLOC_002930 | ZNF248            | 0.51   | 0.58   | 0.80   | -0.66 | -0.46 |
| XLOC_014540 | WDR4              | 6.99   | 5.75   | 10.98  | -0.65 | -0.93 |
| XLOC_013089 | NFU1              | 4.21   | 4.18   | 6.61   | -0.65 | -0.66 |
| XLOC_003091 | LOC100188947      | 3.58   | 3.60   | 5.63   | -0.65 | -0.64 |
| XLOC_008282 | HAS3              | 5.69   | 4.73   | 8.92   | -0.65 | -0.91 |
| XLOC_005423 | LOC100506451      | 1.58   | 1.75   | 2.47   | -0.65 | -0.50 |
| XLOC_011225 | ZNF845            | 0.72   | 0.76   | 1.13   | -0.64 | -0.56 |
| XLOC_013121 | C2orf81           | 4.15   | 4.39   | 6.47   | -0.64 | -0.56 |
| XLOC_005167 | C12orf24          | 7.20   | 7.92   | 11.22  | -0.64 | -0.50 |
| XLOC_002630 | FAS               | 1.81   | 1.86   | 2.83   | -0.64 | -0.60 |

|             |                       |          |          |          |       |       |
|-------------|-----------------------|----------|----------|----------|-------|-------|
| XLOC_024068 | MAP3K15               | 0.31     | 0.36     | 0.49     | -0.64 | -0.46 |
| XLOC_015338 | PHF7                  | 1.75     | 1.14     | 2.72     | -0.64 | -1.25 |
| XLOC_006820 | C14orf128             | 2.16     | 2.31     | 3.34     | -0.63 | -0.53 |
| XLOC_010398 | C18orf56              | 6.47     | 4.88     | 10.00    | -0.63 | -1.04 |
| XLOC_018125 | C5orf54               | 1.16     | 1.24     | 1.78     | -0.63 | -0.52 |
| XLOC_023825 | TCEAL1                | 7.47     | 8.41     | 11.54    | -0.63 | -0.46 |
| XLOC_004359 | RCOR2                 | 1.50     | 0.75     | 2.31     | -0.62 | -1.62 |
| XLOC_012396 | WDR54                 | 8.82     | 9.33     | 13.54    | -0.62 | -0.54 |
| XLOC_018912 | ZNF204P               | 1.01     | 0.96     | 1.55     | -0.62 | -0.68 |
| XLOC_009931 | HOXB7                 | 4.27     | 4.21     | 6.54     | -0.62 | -0.64 |
| XLOC_013534 | SP110                 | 7.81     | 8.51     | 11.97    | -0.62 | -0.49 |
| XLOC_021934 | FAM92A1               | 2.90     | 1.80     | 4.44     | -0.61 | -1.30 |
| XLOC_023379 | CRAT                  | 93.00    | 101.69   | 142.27   | -0.61 | -0.48 |
| XLOC_010139 | ACTG1                 | 670.27   | 731.07   | 1,022.42 | -0.61 | -0.48 |
| XLOC_010558 | C19orf20              | 13.46    | 14.63    | 20.50    | -0.61 | -0.49 |
| XLOC_018466 | ZBTB9                 | 4.69     | 4.30     | 7.13     | -0.60 | -0.73 |
| XLOC_016366 | MYL5                  | 11.74    | 12.24    | 17.81    | -0.60 | -0.54 |
| XLOC_013676 | MIR1292,NOP56,SNORD86 | 1,720.45 | 1,334.45 | 2,600.36 | -0.60 | -0.96 |
| XLOC_015199 | ZNF860                | 0.87     | 0.76     | 1.32     | -0.59 | -0.80 |
| XLOC_015013 | PLA2G6                | 4.16     | 3.81     | 6.27     | -0.59 | -0.72 |
| XLOC_002635 | IFIT1                 | 1.00     | 1.03     | 1.51     | -0.59 | -0.55 |
| XLOC_004969 | MUCL1                 | 159.67   | 163.60   | 239.56   | -0.59 | -0.55 |
| XLOC_010800 | C19orf44              | 2.92     | 2.82     | 4.39     | -0.58 | -0.64 |
| XLOC_005293 | EFCAB4B               | 5.64     | 4.36     | 8.40     | -0.58 | -0.95 |
| XLOC_010088 | FBF1                  | 7.80     | 7.35     | 11.61    | -0.57 | -0.66 |
| XLOC_006987 | C14orf102             | 2.65     | 2.70     | 3.95     | -0.57 | -0.55 |
| XLOC_004988 | DGKA                  | 3.41     | 3.63     | 5.07     | -0.57 | -0.48 |
| XLOC_000725 | SLC27A3               | 7.26     | 7.78     | 10.77    | -0.57 | -0.47 |
| XLOC_004871 | METTL20               | 1.04     | 1.10     | 1.55     | -0.57 | -0.49 |
| XLOC_007043 | CKB                   | 379.74   | 343.94   | 561.96   | -0.57 | -0.71 |
| XLOC_023898 | BCORL1                | 6.09     | 5.84     | 9.01     | -0.56 | -0.63 |
| XLOC_010009 | LIMD2                 | 2.44     | 1.95     | 3.60     | -0.56 | -0.89 |
| XLOC_003722 | SYT12                 | 31.54    | 34.03    | 46.50    | -0.56 | -0.45 |
| XLOC_011487 | TUBB4                 | 3.04     | 2.20     | 4.48     | -0.56 | -1.03 |
| XLOC_010770 | CD97                  | 3.16     | 2.27     | 4.63     | -0.55 | -1.03 |
| XLOC_021301 | ERV3-1,ZNF117         | 0.58     | 0.50     | 0.85     | -0.55 | -0.76 |
| XLOC_001672 | PSRC1                 | 15.49    | 16.25    | 22.64    | -0.55 | -0.48 |
| XLOC_008611 | FBXL19-AS1            | 0.72     | 0.66     | 1.05     | -0.54 | -0.67 |
| XLOC_023592 | POLA1                 | 3.37     | 3.42     | 4.88     | -0.53 | -0.51 |
| XLOC_011855 | KCNN4                 | 8.36     | 7.14     | 12.10    | -0.53 | -0.76 |
| XLOC_021566 | BRAF                  | 1.22     | 1.28     | 1.77     | -0.53 | -0.47 |
| XLOC_001213 | TP73-AS1              | 1.50     | 1.17     | 2.16     | -0.52 | -0.88 |
| XLOC_011030 | TMEM145               | 4.97     | 5.06     | 7.13     | -0.52 | -0.50 |
| XLOC_014508 | LOC100506428          | 7.25     | 6.99     | 10.40    | -0.52 | -0.57 |
| XLOC_023069 | KIF24                 | 3.25     | 3.19     | 4.65     | -0.52 | -0.55 |
| XLOC_002617 | LOC439994             | 2.50     | 1.55     | 3.57     | -0.51 | -1.20 |
| XLOC_011965 | FUZ                   | 13.51    | 13.05    | 19.26    | -0.51 | -0.56 |
| XLOC_009436 | C1QTNF1               | 4.17     | 3.59     | 5.94     | -0.51 | -0.73 |
| XLOC_000434 | AK4                   | 3.38     | 3.31     | 4.82     | -0.51 | -0.54 |
| XLOC_011813 | EXOSC5                | 24.92    | 21.07    | 35.50    | -0.51 | -0.75 |
| XLOC_007012 | SERPINA1              | 28.91    | 28.30    | 41.15    | -0.51 | -0.54 |
| XLOC_021328 | WBSCR27               | 6.21     | 5.62     | 8.83     | -0.51 | -0.65 |
| XLOC_011675 | NR2C2AP               | 29.20    | 25.62    | 41.41    | -0.50 | -0.69 |
| XLOC_009195 | TUBG2                 | 3.73     | 3.50     | 5.27     | -0.50 | -0.59 |
| XLOC_009545 | ZNF594                | 0.38     | 0.38     | 0.54     | -0.50 | -0.51 |
| XLOC_009621 | LOC100289255          | 6.94     | 5.12     | 9.80     | -0.50 | -0.94 |
| XLOC_019015 | PSMB8                 | 6.90     | 6.74     | 9.73     | -0.50 | -0.53 |
| XLOC_008588 | TBX6                  | 6.25     | 4.42     | 8.81     | -0.50 | -0.99 |
| XLOC_014940 | CHEK2                 | 11.13    | 10.54    | 15.67    | -0.49 | -0.57 |
| XLOC_015490 | PDIA5                 | 19.15    | 17.11    | 26.97    | -0.49 | -0.66 |
| XLOC_011549 | S1PR5                 | 5.51     | 5.09     | 7.75     | -0.49 | -0.61 |
| XLOC_024256 | SYTL4                 | 1.45     | 1.46     | 2.03     | -0.49 | -0.48 |
| XLOC_014356 | CBR3                  | 8.47     | 7.83     | 11.90    | -0.49 | -0.60 |

|             |              |       |       |       |       |       |
|-------------|--------------|-------|-------|-------|-------|-------|
| XLOC_010820 | B3GNT3       | 5.14  | 5.24  | 7.21  | -0.49 | -0.46 |
| XLOC_006002 | RNASEH2B     | 5.83  | 5.93  | 8.17  | -0.49 | -0.46 |
| XLOC_023376 | CCBL1        | 2.57  | 2.45  | 3.61  | -0.49 | -0.56 |
| XLOC_011959 | PIH1D1       | 55.58 | 53.37 | 77.75 | -0.48 | -0.54 |
| XLOC_023299 | AKNA         | 1.35  | 1.37  | 1.87  | -0.47 | -0.45 |
| XLOC_022462 | C8orf51      | 5.67  | 5.15  | 7.88  | -0.47 | -0.61 |
| XLOC_012177 | LOC100506054 | 5.20  | 5.28  | 7.22  | -0.47 | -0.45 |
| XLOC_004852 | LYRM5        | 9.17  | 9.21  | 12.67 | -0.47 | -0.46 |
| XLOC_001216 | C1orf174     | 7.27  | 7.10  | 10.05 | -0.47 | -0.50 |
| XLOC_022637 | POLR1E       | 11.52 | 10.48 | 15.85 | -0.46 | -0.60 |
| XLOC_000641 | PDIA3P       | 0.86  | 0.74  | 1.19  | -0.46 | -0.68 |
| XLOC_001701 | SLC16A1      | 0.73  | 0.54  | 1.00  | -0.46 | -0.89 |
| XLOC_008211 | MT1F         | 42.43 | 36.92 | 58.23 | -0.46 | -0.66 |
| XLOC_008708 | C16orf48     | 45.53 | 45.26 | 62.47 | -0.46 | -0.46 |
| XLOC_009902 | ARHGAP27     | 3.83  | 3.26  | 5.24  | -0.45 | -0.68 |
| XLOC_001277 | ZBTB17       | 9.70  | 9.02  | 13.27 | -0.45 | -0.56 |

---
